# Supplementary material for: Secondary Metabolites with Anti-Inflammatory Activities from One Actinobacteria Amycolatopsis taiwanensis
Source: MDPI journal article supplement (doi:10.3390/molecules26195765), 2021-09-23
Supplement: s1 [file s1]

## Supplementary File

# Secondary Metabolites with Anti-Inflammatory Activities from one Actinobacteria *Amycolatopsis taiwanensis*

Yung-Shun Su <sup>1,2</sup>, Ming-Der Wu <sup>3</sup>, Jih-Jung Chen <sup>4,5,\*</sup>, Ming-Jen Cheng <sup>3,\*</sup>, Yueh-Hsiung Kuo <sup>6,7,8</sup>, Chee-Yin Chai <sup>1,9</sup> and Aij-Lie Kwan <sup>1,10,11,\*</sup>

<sup>1</sup> Graduate Institute of Medicine, College of Medicine, Kaohsiung Medical University (KMU), Kaohsiung 807, Taiwan; mariussu@gmail.com (Y.-S.S.); cychai@kmu.edu.tw (C.-Y.C.); aijliekw@kmu.edu.tw (A.-L.K.)

<sup>2</sup> Department of Dermatology, Kaohsiung Medical University Chung-Ho Memorial Hospital, Kaohsiung 807, Taiwan

<sup>3</sup> Bioresource Collection and Research Center (BCRC), Food Industry Research and Development Institute (FIRDI), Hsinchu 300, Taiwan; wmd@firdi.org.tw

<sup>4</sup> Department of Pharmacy, School of Pharmaceutical Sciences, National Yang Ming Chiao Tung University (NYCU), Taipei 112, Taiwan

<sup>5</sup> Department of Medical Research, China Medical University Hospital, Taichung 404, Taiwan

<sup>6</sup> Department of Chemistry, National Taiwan University, Taipei 106, Taiwan; yhk800@gmail.com

<sup>7</sup> Department of Biotechnology, Asia University, Taichung 413, Taiwan

<sup>8</sup> Department of Chinese Pharmaceutical Sciences and Chinese Medicine Resources, College of Pharmacy, China Medical University, Taichung 404, Taiwan

<sup>9</sup> Department of Pathology, Kaohsiung Medical University Chung-Ho Memorial Hospital, Kaohsiung 807, Taiwan

<sup>10</sup> Ph.D. Program in Environmental and Occupational Medicine, College of Medicine, Kaohsiung Medical University and National Health Research Institutes, Kaohsiung 807, Taiwan

<sup>11</sup> Department of Neurosurgery, Kaohsiung Medical University Chung-Ho Memorial Hospital, Kaohsiung 807, Taiwan

\* Correspondence: jjungchen@nycu.edu.tw (J.-J.C.); chengfirdi@gmail.com (M.-J.C.)

**Citation:** Su, Y.-S.; Wu, M.-D.; Chen, J.-J.; Cheng, M.-J.; Kuo, Y.-H.; Chai, C.-Y.; Kwan, A.-L. Secondary Metabolites with Anti-Inflammatory Activities from one Actinobacteria *Amycolatopsis taiwanensis*. *Molecules* **2021**, *26*, 5765. <https://doi.org/10.3390/molecules26195765>

Academic Editor: Bruno Botta

Received: 13 August 2021

Accepted: 10 September 2021

Published: 21 September 2021

**Publisher's Note:** MDPI stays neutral with regard to jurisdictional claims in published maps and institutional affiliations.

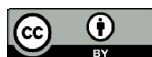

**Copyright:** © 2021 by the authors. Licensee MDPI, Basel, Switzerland. This article is an open access article distributed under the terms and conditions of the Creative Commons Attribution (CC BY) license (<http://creativecommons.org/licenses/by/4.0/>).

---

## Contents

|                                                                         |    |
|-------------------------------------------------------------------------|----|
| Figure S1. $^1\text{H}$ NMR spectrum of <b>1</b> .....                  | 5  |
| Figure S2. $^{13}\text{C}$ NMR spectrum of <b>1</b> .....               | 5  |
| Figure S3. $^1\text{H}$ - $^1\text{H}$ COSY spectrum of <b>1</b> .....  | 6  |
| Figure S4. HMBC spectrum of <b>1</b> .....                              | 6  |
| Figure S5. NOESY spectrum of <b>1</b> .....                             | 7  |
| Figure S6. HSQC spectrum of <b>1</b> .....                              | 7  |
| Figure S7. EI-MS spectrum of <b>1</b> .....                             | 8  |
| Figure S8. $^1\text{H}$ NMR spectrum of <b>2</b> .....                  | 9  |
| Figure S9. $^{13}\text{C}$ NMR spectrum of <b>2</b> .....               | 9  |
| Figure S10. $^1\text{H}$ - $^1\text{H}$ COSY spectrum of <b>2</b> ..... | 10 |
| Figure S11. HMBC spectrum of <b>2</b> .....                             | 10 |
| Figure S12. NOESY spectrum of <b>2</b> .....                            | 11 |
| Figure S13. HSQC spectrum of <b>2</b> .....                             | 11 |
| Figure S14. EI-MS spectrum of <b>2</b> .....                            | 12 |
| Figure S15. $^1\text{H}$ NMR spectrum of <b>3</b> .....                 | 13 |
| Figure S16. $^{13}\text{C}$ NMR spectrum of <b>3</b> .....              | 13 |
| Figure S17. $^1\text{H}$ - $^1\text{H}$ COSY spectrum of <b>3</b> ..... | 14 |
| Figure S18. HMBC spectrum of <b>3</b> .....                             | 14 |
| Figure S19. NOESY spectrum of <b>3</b> .....                            | 15 |
| Figure S20. HSQC spectrum of <b>3</b> .....                             | 15 |
| Figure S21. EI-MS spectrum of <b>3</b> .....                            | 16 |
| Figure S22. $^1\text{H}$ NMR spectrum of <b>4</b> .....                 | 17 |
| Figure S23. $^{13}\text{C}$ NMR spectrum of <b>4</b> .....              | 17 |
| Figure S24. $^1\text{H}$ - $^1\text{H}$ COSY spectrum of <b>4</b> ..... | 18 |
| Figure S25. HMBC spectrum of <b>4</b> .....                             | 18 |
| Figure S26. NOESY spectrum of <b>4</b> .....                            | 19 |
| Figure S27. HSQC spectrum of <b>4</b> .....                             | 19 |
| Figure S28. EI-MS spectrum of <b>4</b> .....                            | 20 |
| Figure S29. $^1\text{H}$ NMR spectrum of <b>5</b> .....                 | 21 |
| Figure S30. $^{13}\text{C}$ NMR spectrum of <b>5</b> .....              | 21 |
| Figure S31. $^1\text{H}$ - $^1\text{H}$ COSY spectrum of <b>5</b> ..... | 22 |
| Figure S32. HMBC spectrum of <b>5</b> .....                             | 22 |

---

|                                                                            |    |
|----------------------------------------------------------------------------|----|
| Figure S33. NOESY spectrum of <b>5</b> .....                               | 23 |
| Figure S34. HSQC spectrum of <b>5</b> .....                                | 23 |
| Figure S35. EI-MS spectrum of <b>5</b> .....                               | 24 |
| Figure S36. <sup>1</sup> H NMR spectrum of <b>6</b> .....                  | 25 |
| Figure S37. <sup>13</sup> C NMR/DEPT spectra of <b>6</b> .....             | 25 |
| Figure S38. <sup>1</sup> H- <sup>1</sup> H COSY spectrum of <b>6</b> ..... | 26 |
| Figure S39. HMBC spectrum of <b>6</b> .....                                | 26 |
| Figure S40. NOESY spectrum of <b>6</b> .....                               | 27 |
| Figure S41. HSQC spectrum of <b>6</b> .....                                | 27 |
| Figure S42. EI-MS spectrum of <b>6</b> .....                               | 28 |
| Figure S43. <sup>1</sup> H NMR spectrum of <b>7</b> .....                  | 29 |
| Figure S44. <sup>13</sup> C NMR/DEPT spectra of <b>7</b> .....             | 29 |
| Figure S45. <sup>1</sup> H- <sup>1</sup> H COSY spectrum of <b>7</b> ..... | 30 |
| Figure S46. HMBC spectrum of <b>7</b> .....                                | 30 |
| Figure S47. NOESY spectrum of <b>7</b> .....                               | 31 |
| Figure S48. HSQC spectrum of <b>7</b> .....                                | 31 |
| Figure S49. EI-MS spectrum of <b>7</b> .....                               | 32 |
| Figure S50. <sup>1</sup> H NMR spectrum of <b>8</b> .....                  | 33 |
| Figure S51. <sup>13</sup> C NMR/DEPT spectra of <b>8</b> .....             | 33 |
| Figure S52. <sup>1</sup> H- <sup>1</sup> H COSY spectrum of <b>8</b> ..... | 34 |
| Figure S53. HMBC spectrum of <b>8</b> .....                                | 34 |
| Figure S54. NOESY spectrum of <b>8</b> .....                               | 35 |
| Figure S55. HSQC spectrum of <b>8</b> .....                                | 35 |
| Figure S56. EI-MS spectrum of <b>8</b> .....                               | 36 |
| Figure S57. <sup>1</sup> H NMR spectrum of <b>9</b> .....                  | 37 |
| Figure S58. <sup>13</sup> C NMR/DEPT spectra of <b>9</b> .....             | 37 |
| Figure S59. <sup>1</sup> H- <sup>1</sup> H COSY spectrum of <b>9</b> ..... | 38 |
| Figure S60. HMBC spectrum of <b>9</b> .....                                | 38 |
| Figure S61. NOESY spectrum of <b>9</b> .....                               | 39 |
| Figure S62. HSQC spectrum of <b>9</b> .....                                | 39 |
| Figure S63. EI-MS spectrum of <b>9</b> .....                               | 40 |
| Figure S64. <sup>1</sup> H NMR spectrum of <b>10</b> .....                 | 41 |
| Figure S65. <sup>13</sup> C NMR/DEPT spectra of <b>10</b> .....            | 41 |

---

|                                                                          |    |
|--------------------------------------------------------------------------|----|
| Figure S66. $^1\text{H}$ - $^1\text{H}$ COSY spectrum of <b>10</b> ..... | 42 |
| Figure S67. HMBC spectrum of <b>10</b> .....                             | 42 |
| Figure S68. NOESY spectrum of <b>10</b> .....                            | 43 |
| Figure S69. HSQC spectrum of <b>10</b> .....                             | 43 |
| Figure S70. EI-MS spectrum of <b>10</b> .....                            | 44 |

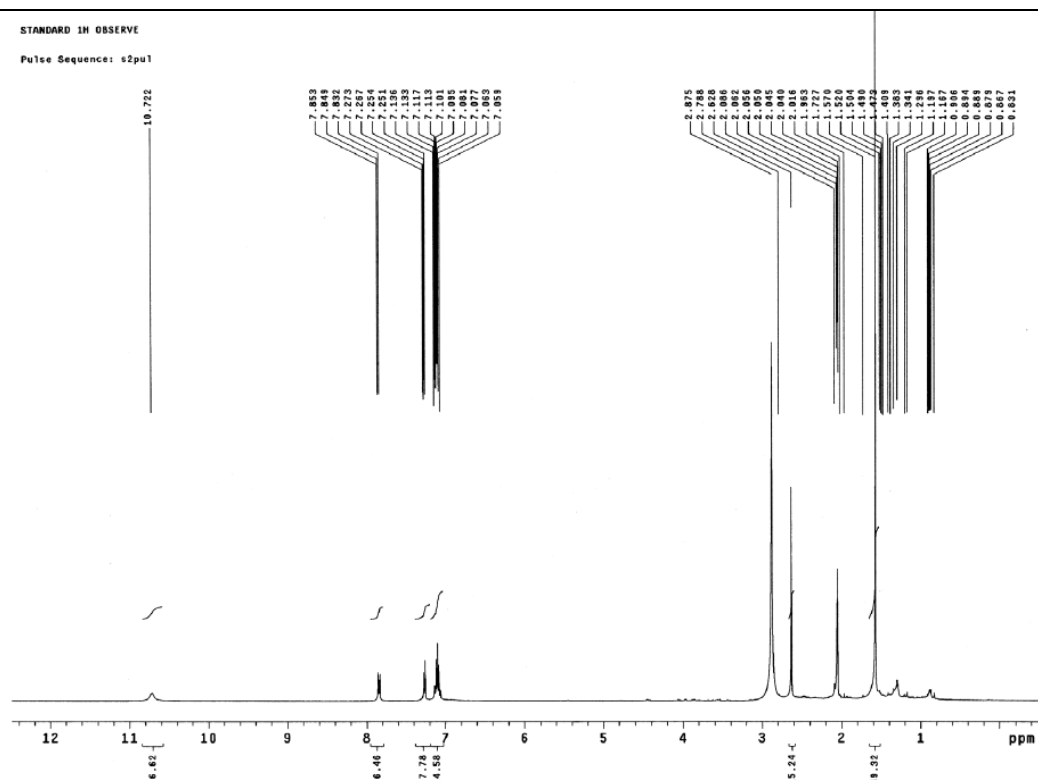Figure S1.  $^1\text{H}$  NMR spectrum of **1**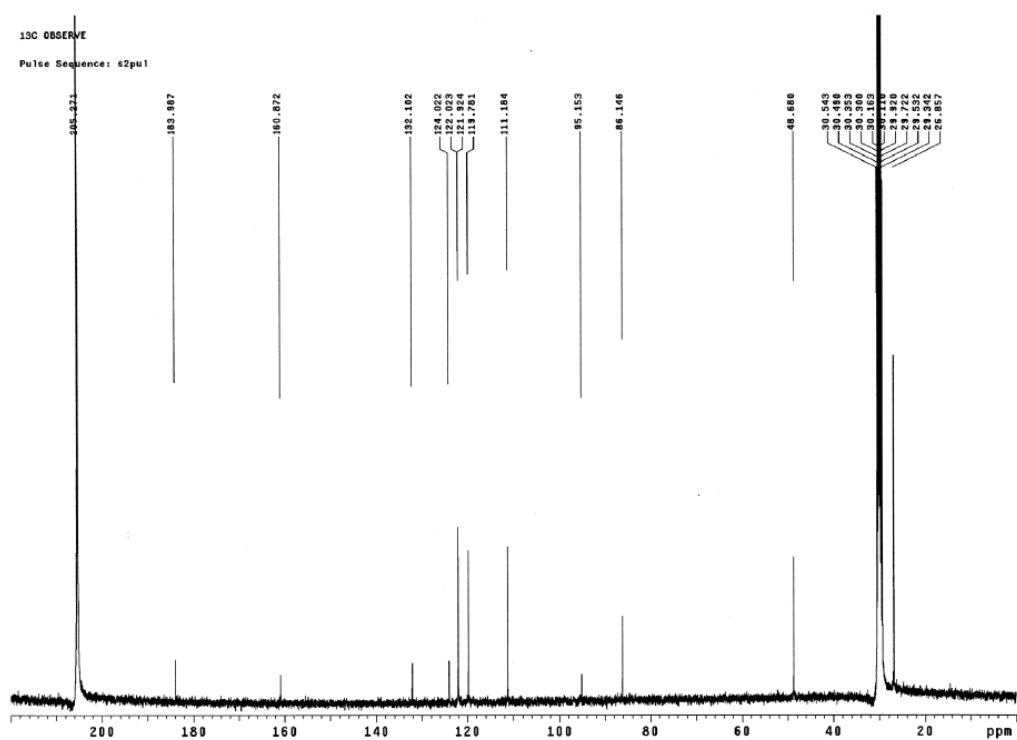

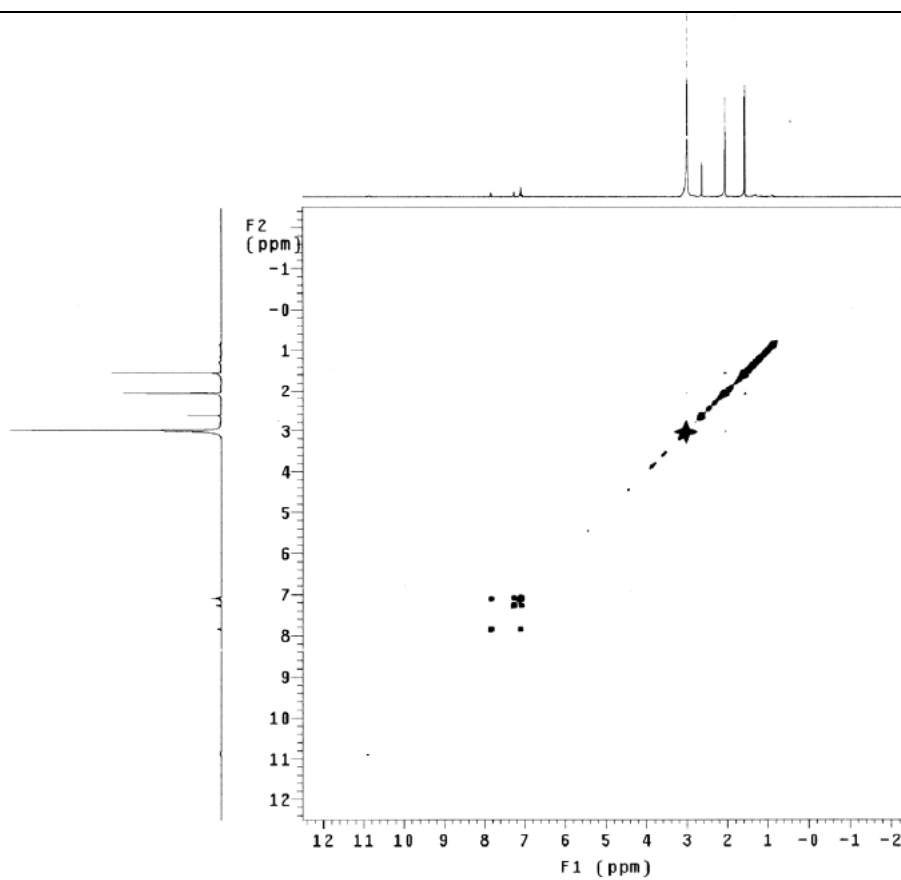

Figure S3. COSY spectrum of 1

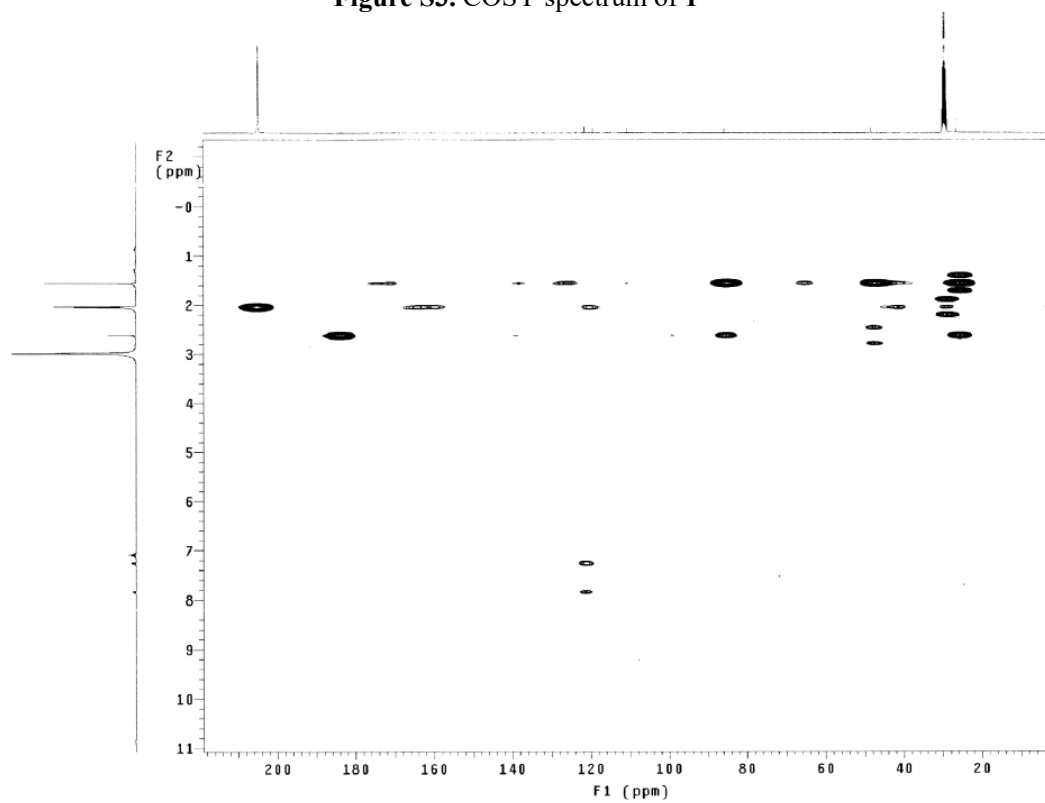

Figure S4. HMBC spectrum of 1

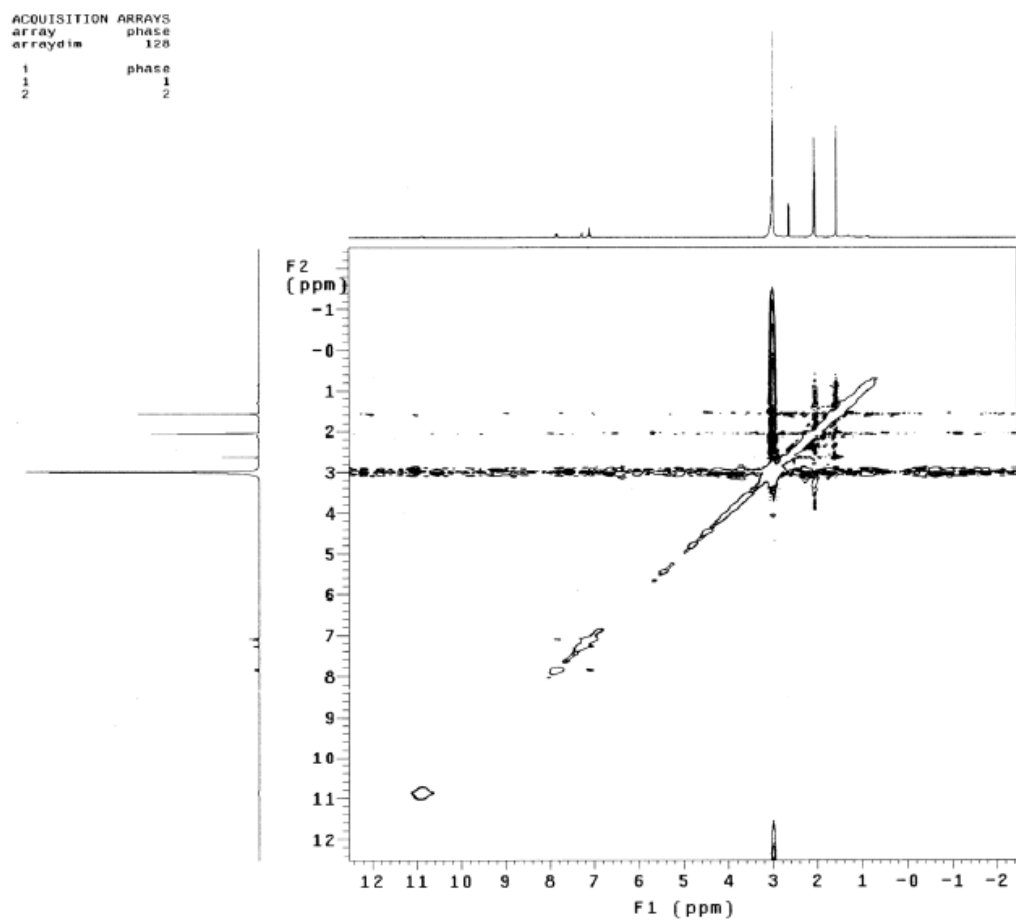

Figure S5. NOESY spectrum of 1

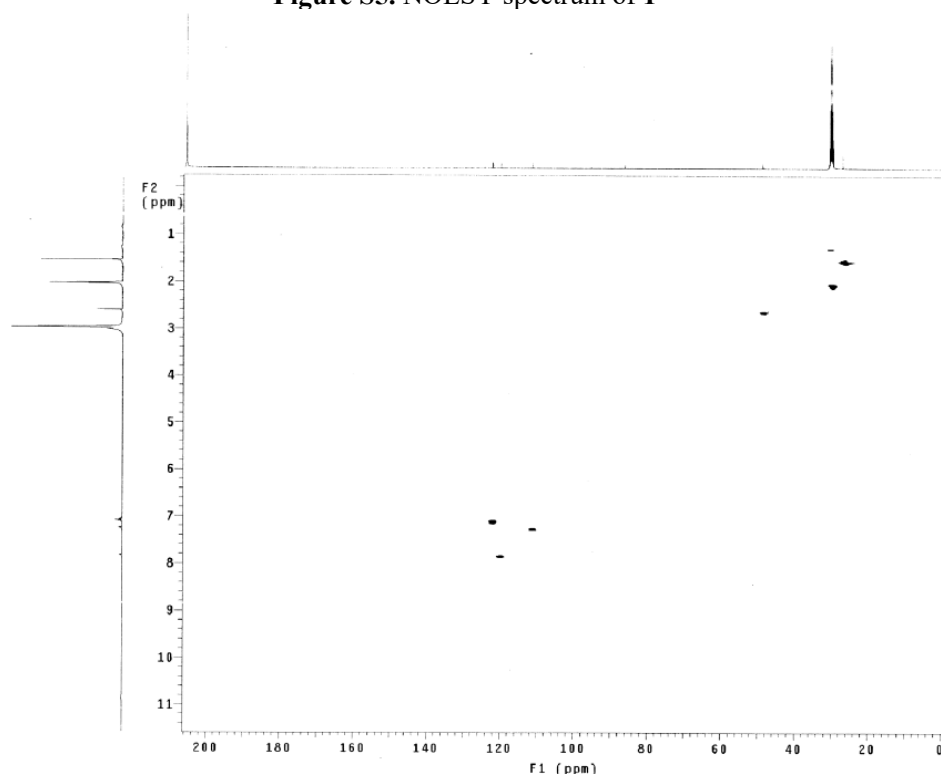

Figure S6. HSQC spectrum of 1

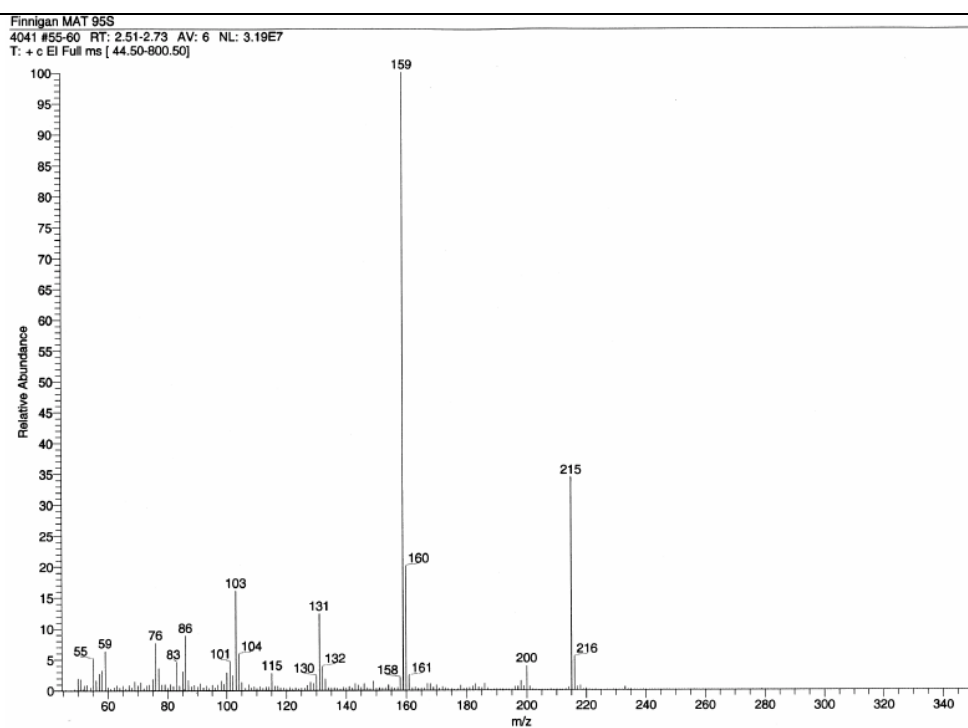

Figure S7. EIMS spectrum of **1**



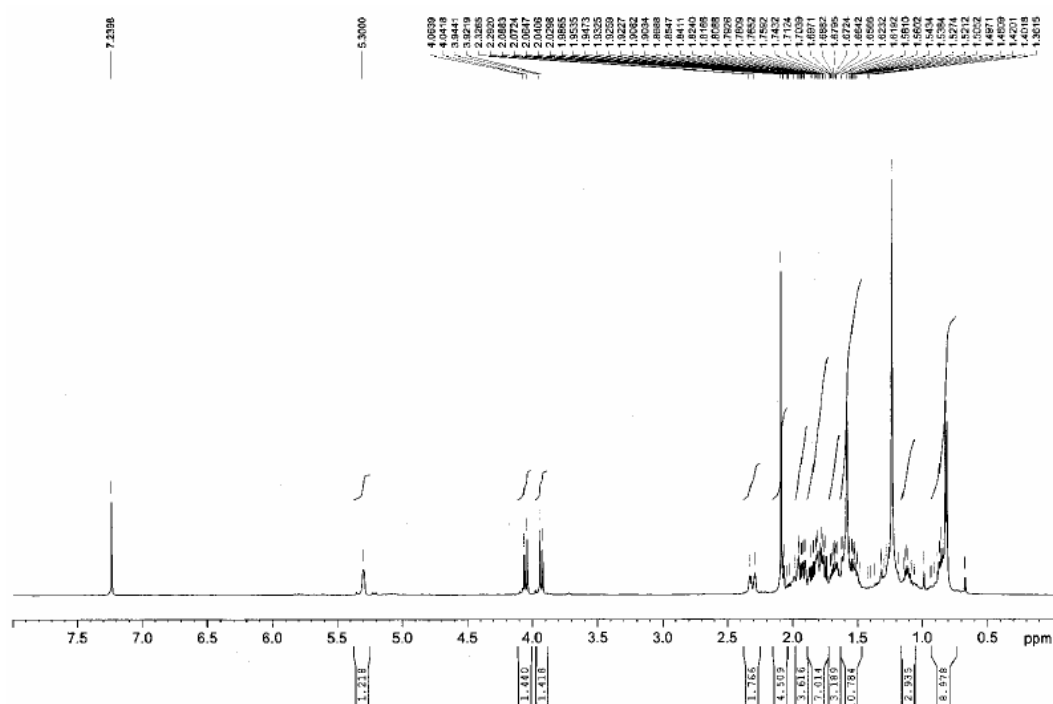Figure S8. <sup>1</sup>H NMR spectrum of 2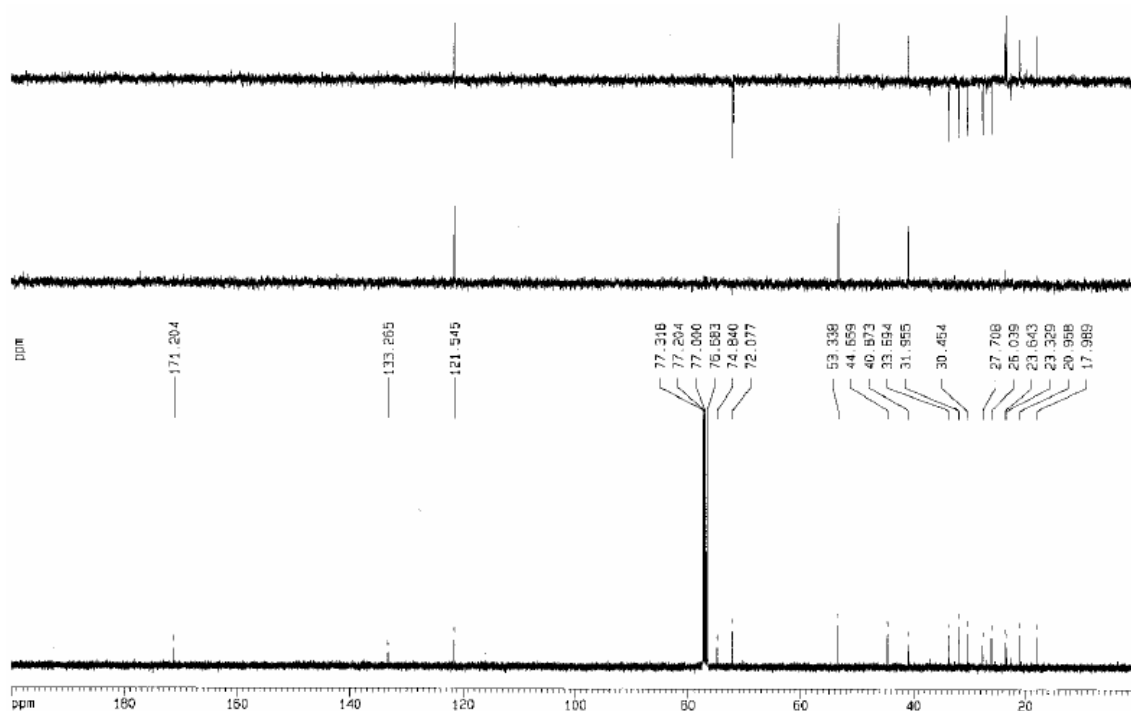Figure S9. <sup>13</sup>C NMR spectrum of 2

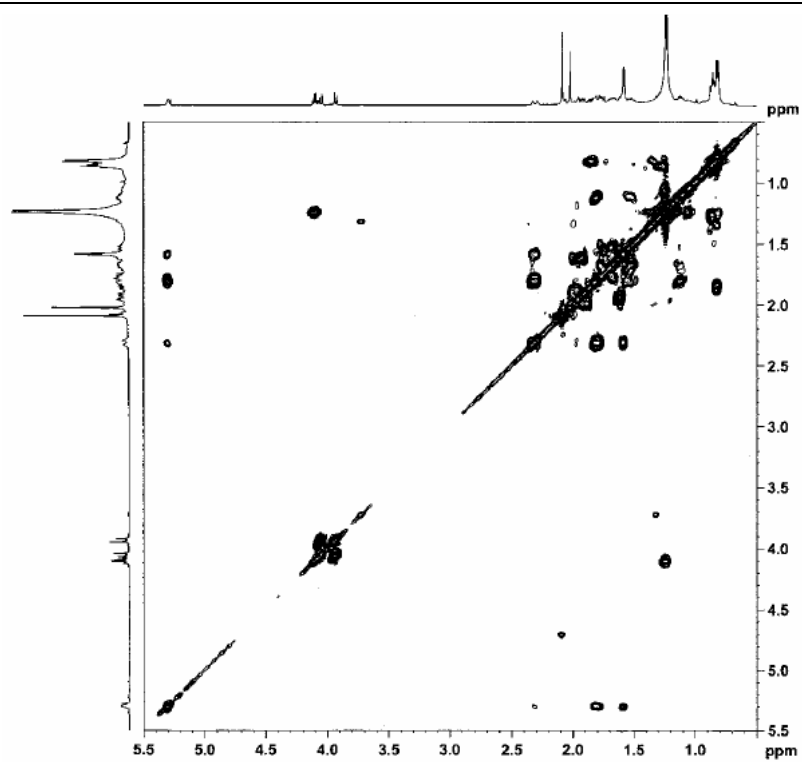

Figure S10. COSY spectrum of 2

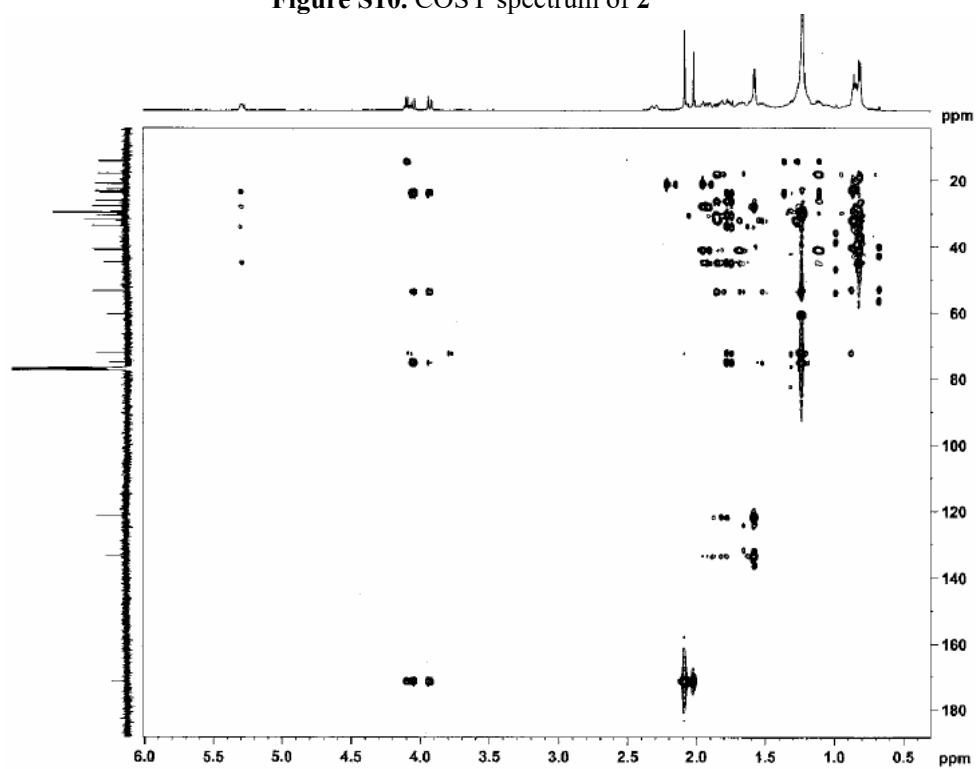

Figure S11. HMBC spectrum of 2

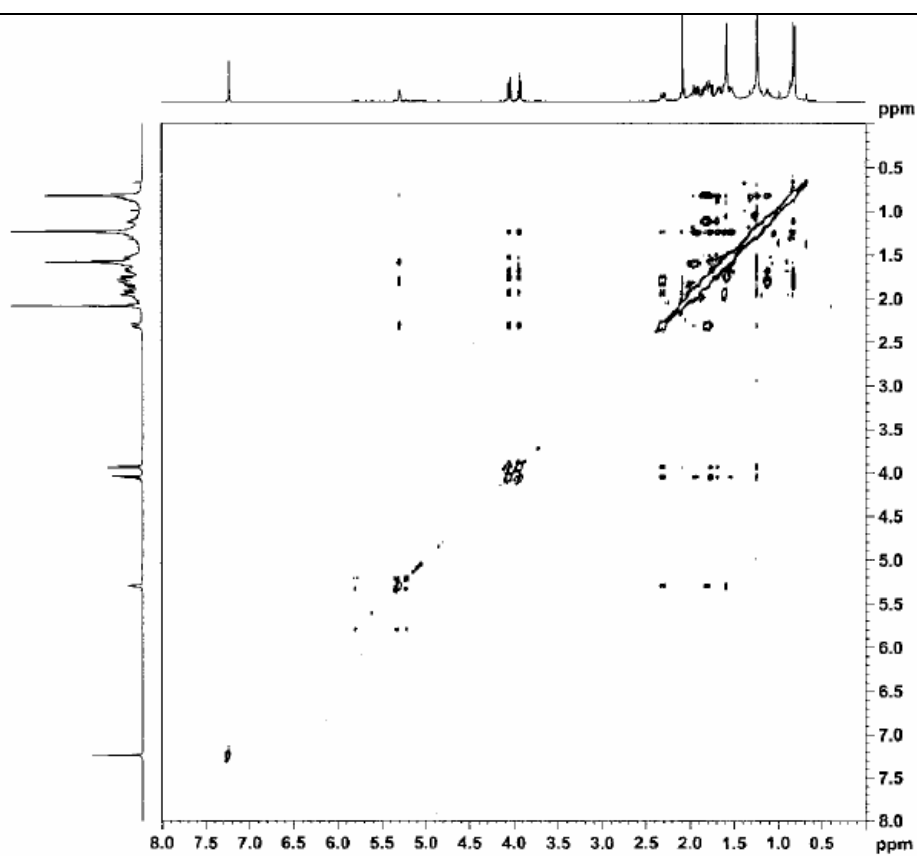

Figure S12. NOESY spectrum of 2

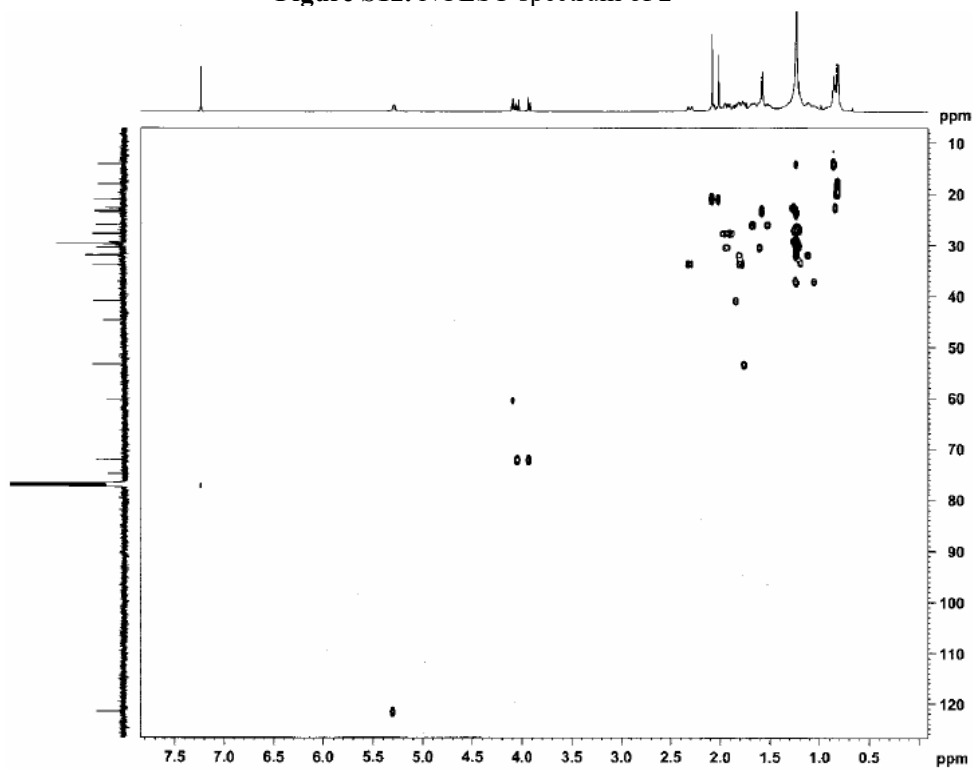

Figure S13. HSQC spectrum of 2

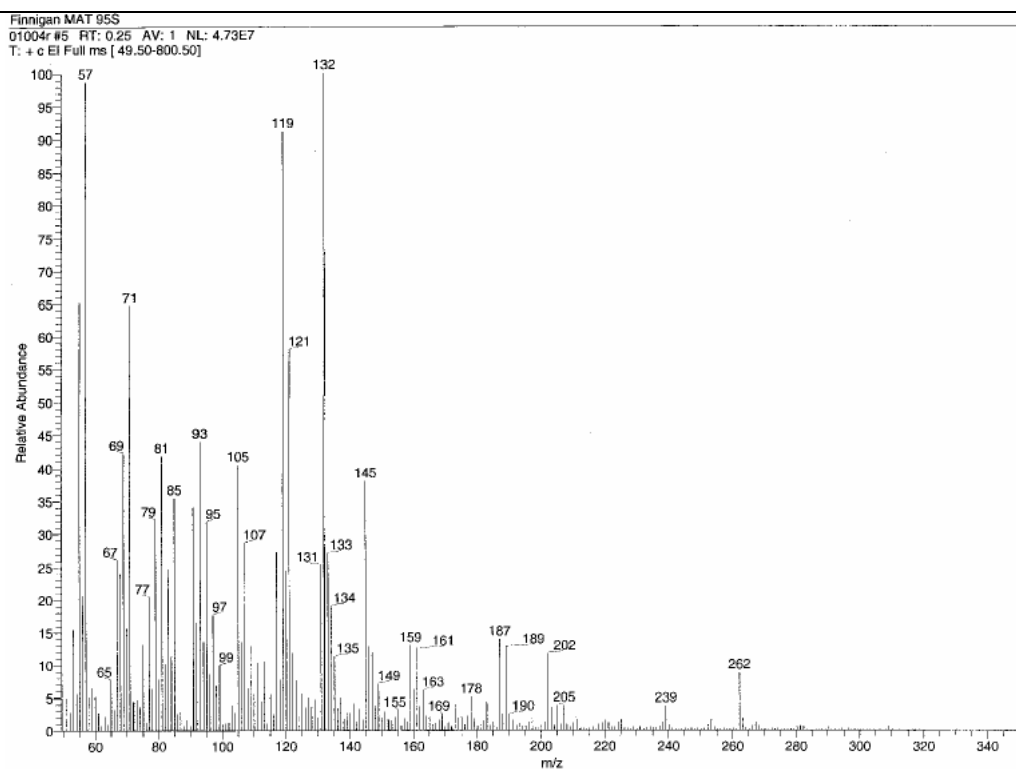

Figure S14. EI-MS spectrum of 2

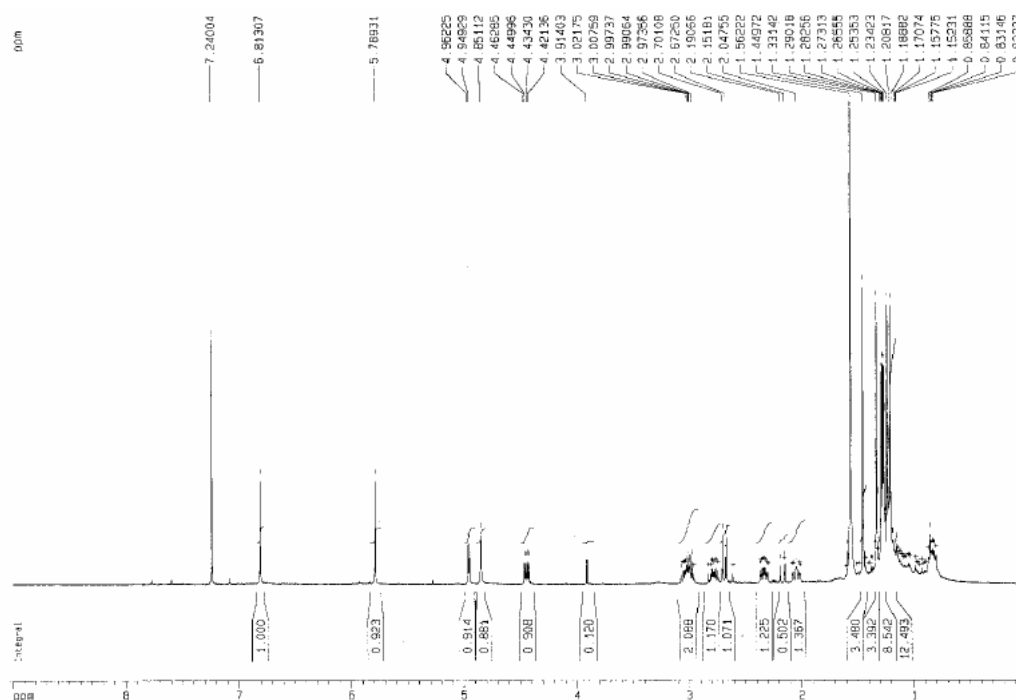Figure S15. <sup>1</sup>H NMR spectrum of 3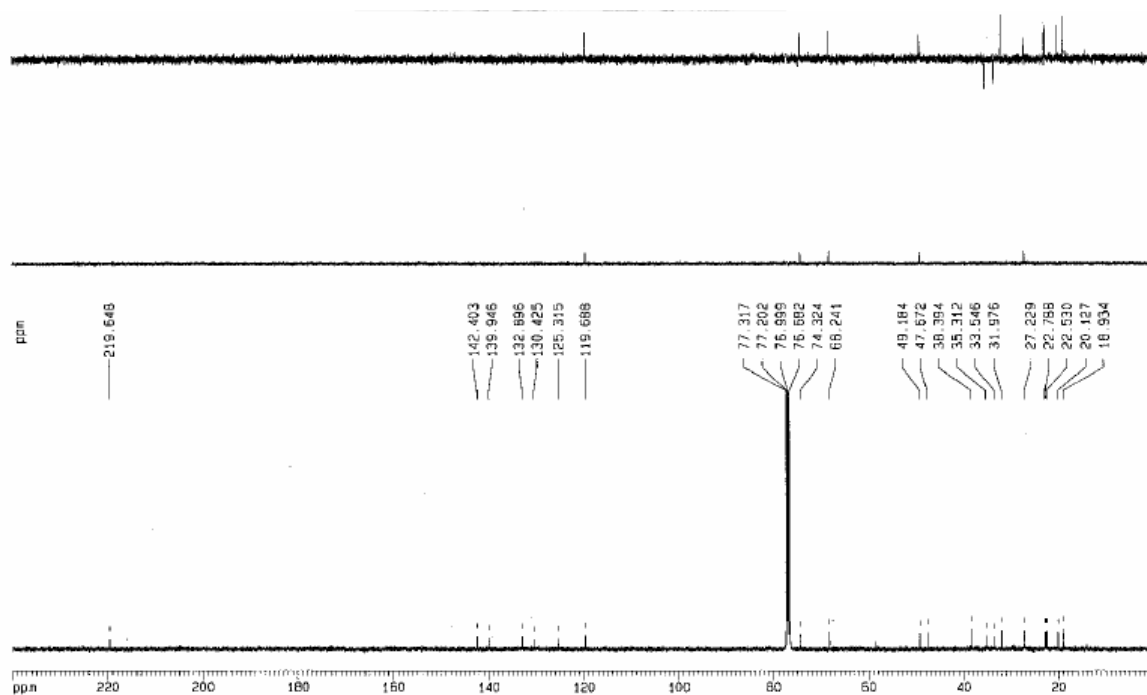Figure S16. <sup>13</sup>C NMR spectrum of 3

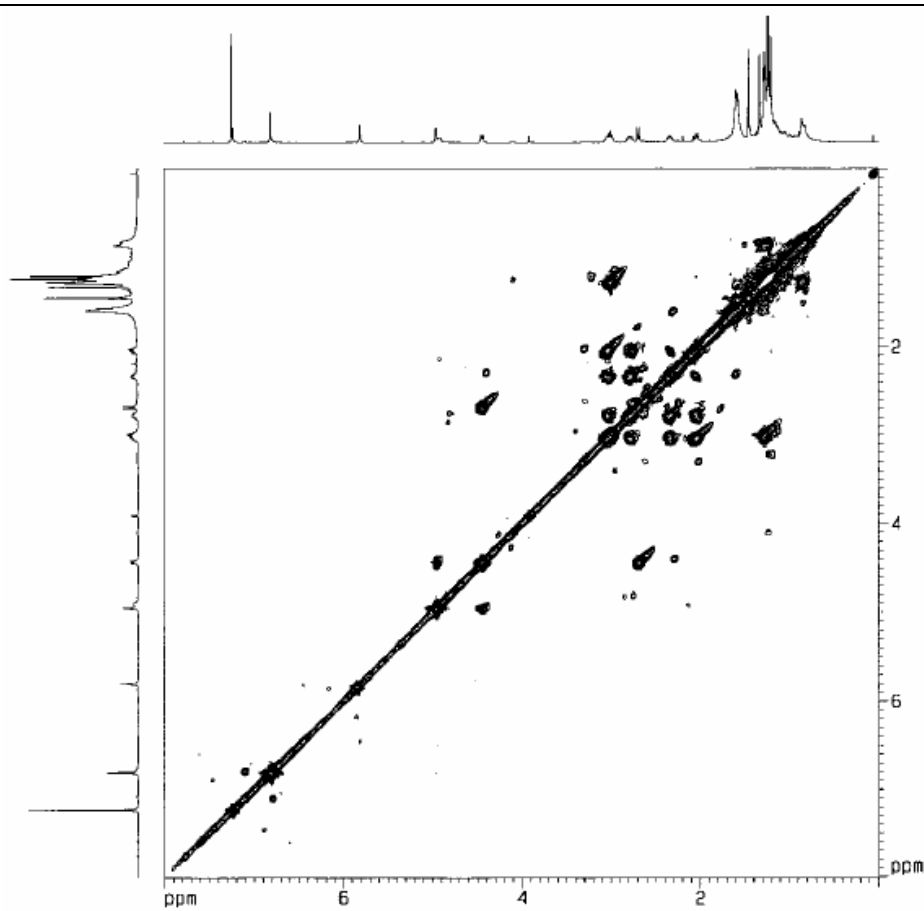

Figure S17. COSY spectrum of 3

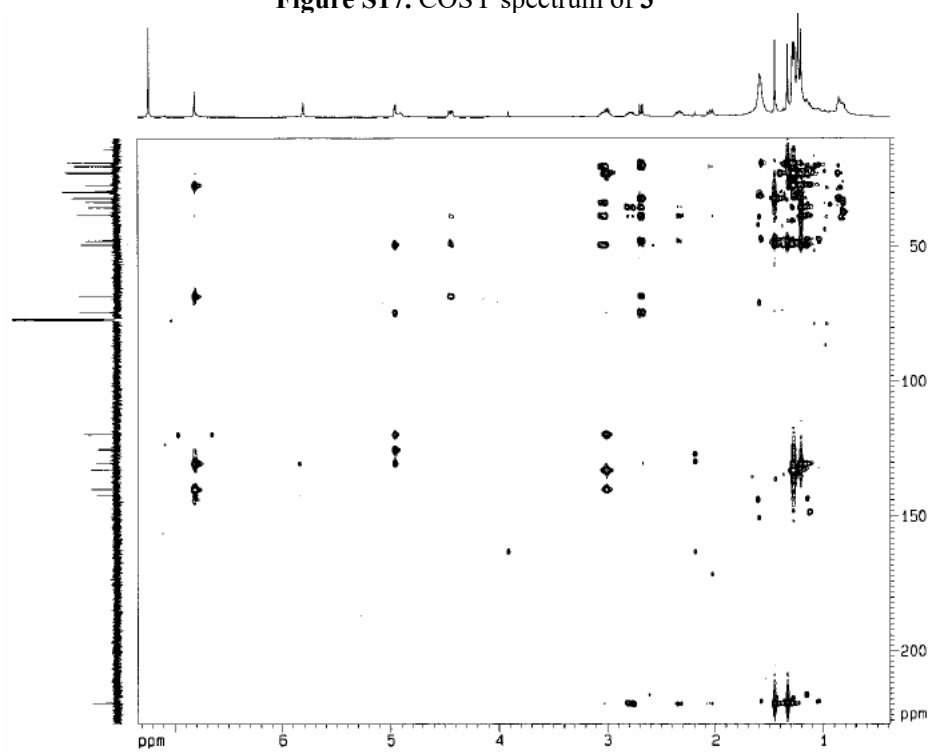

Figure S18. HMBC spectrum of 3

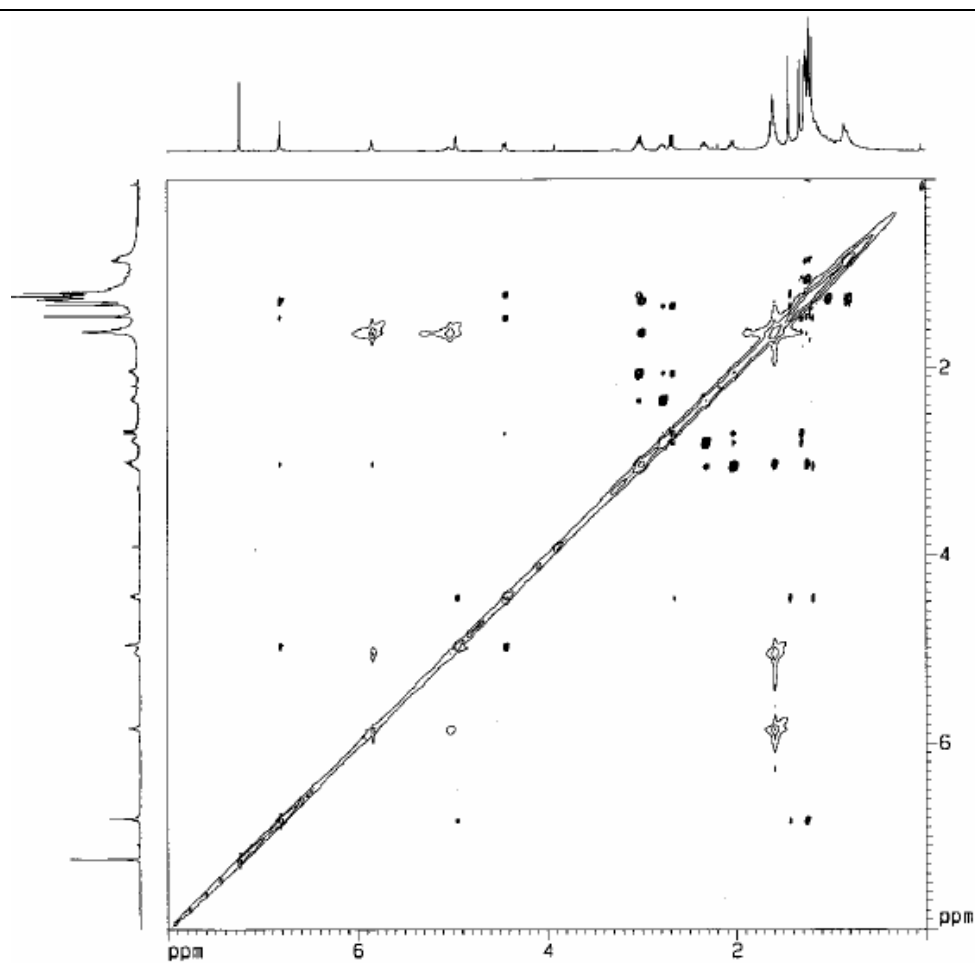

Figure S19. NOESY spectrum of 3

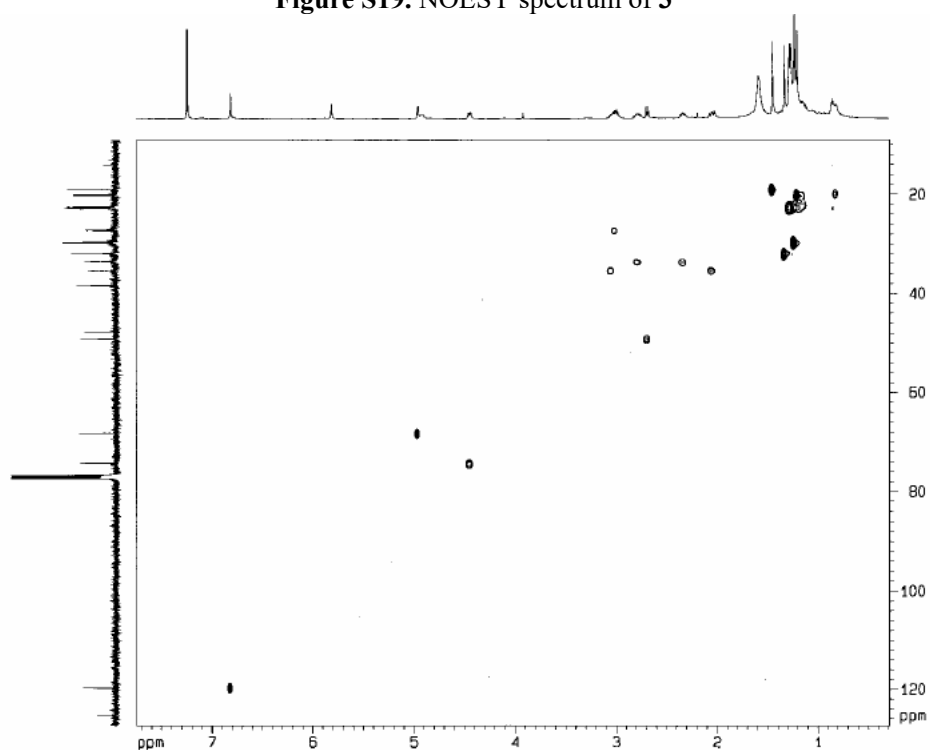

Figure S20. HSQC spectrum of 3

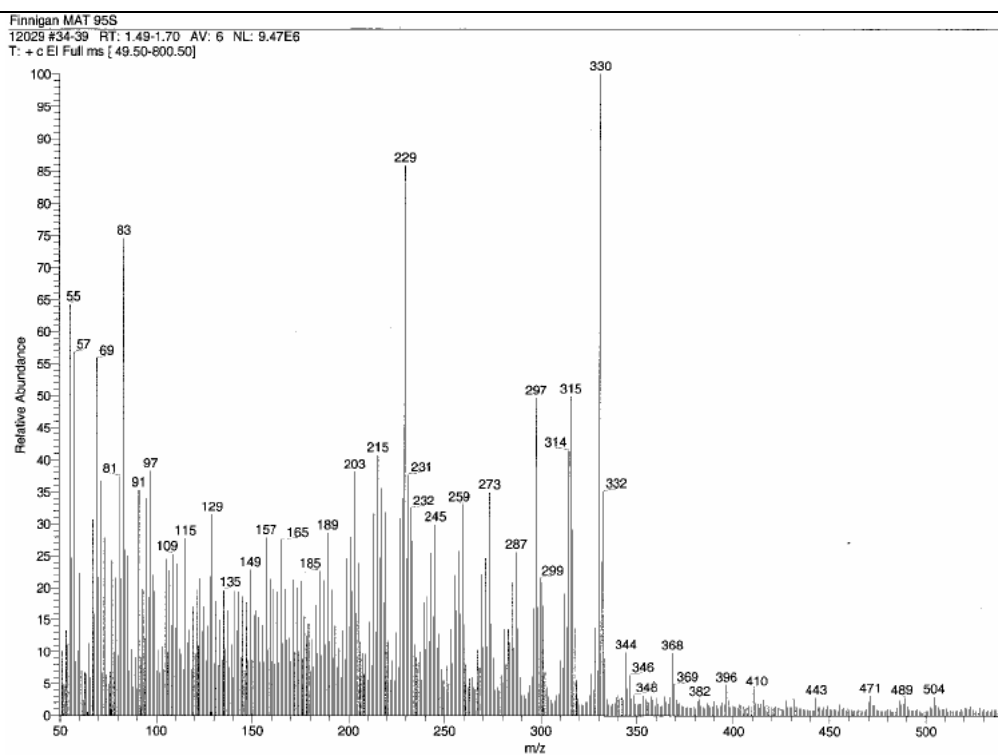

Figure S21. EI-MS spectrum of **3**



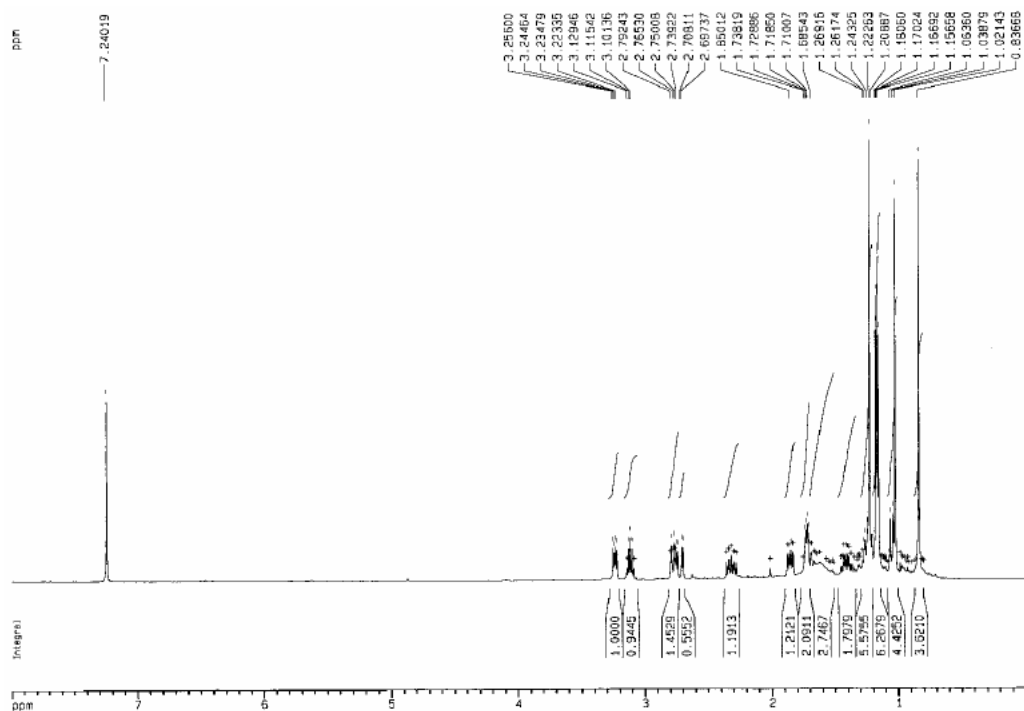Figure S22. <sup>1</sup>H NMR spectrum of 4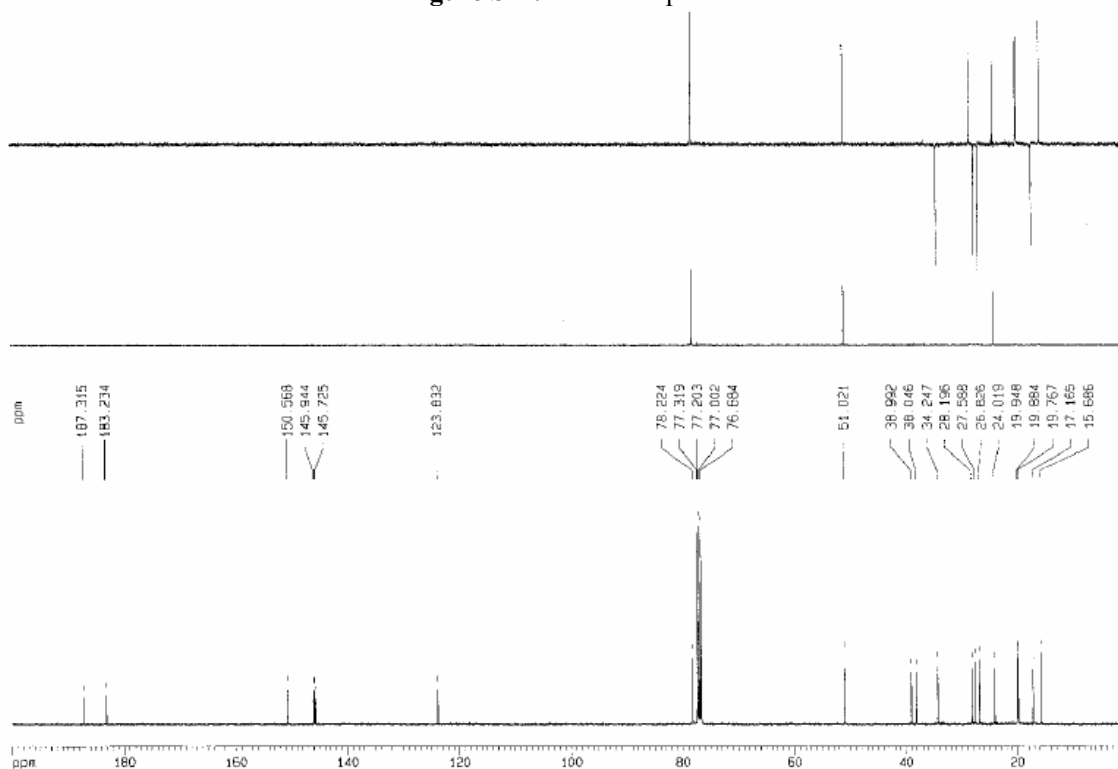Figure S23. <sup>13</sup>C spectrum of 4

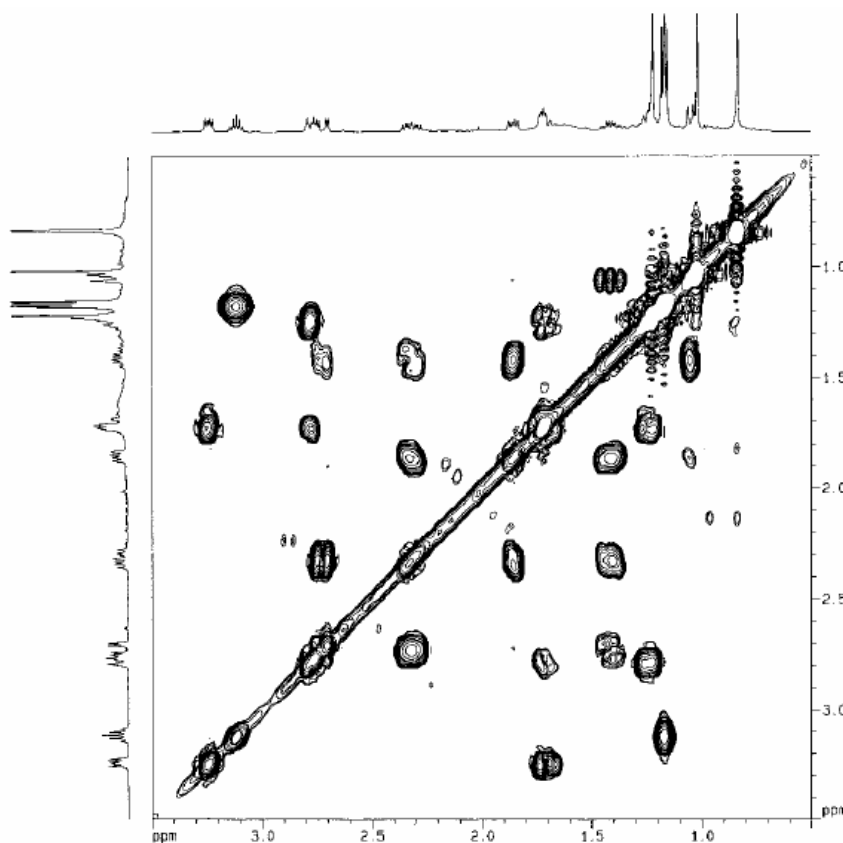

Figure S24. COSY spectrum of 4

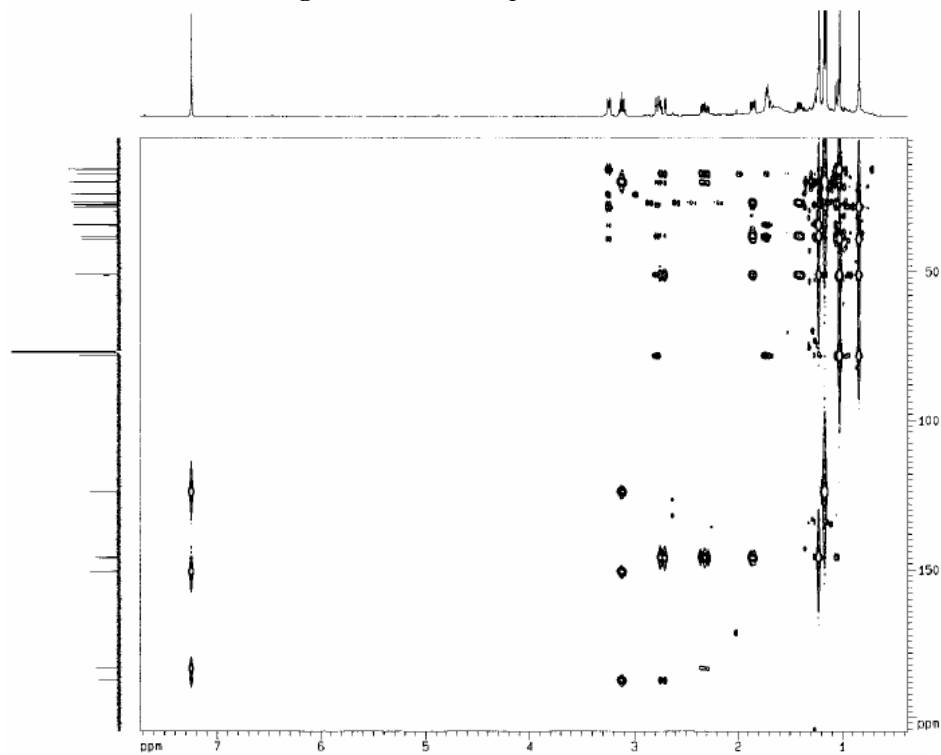

Figure S25. HMBC spectrum of 4

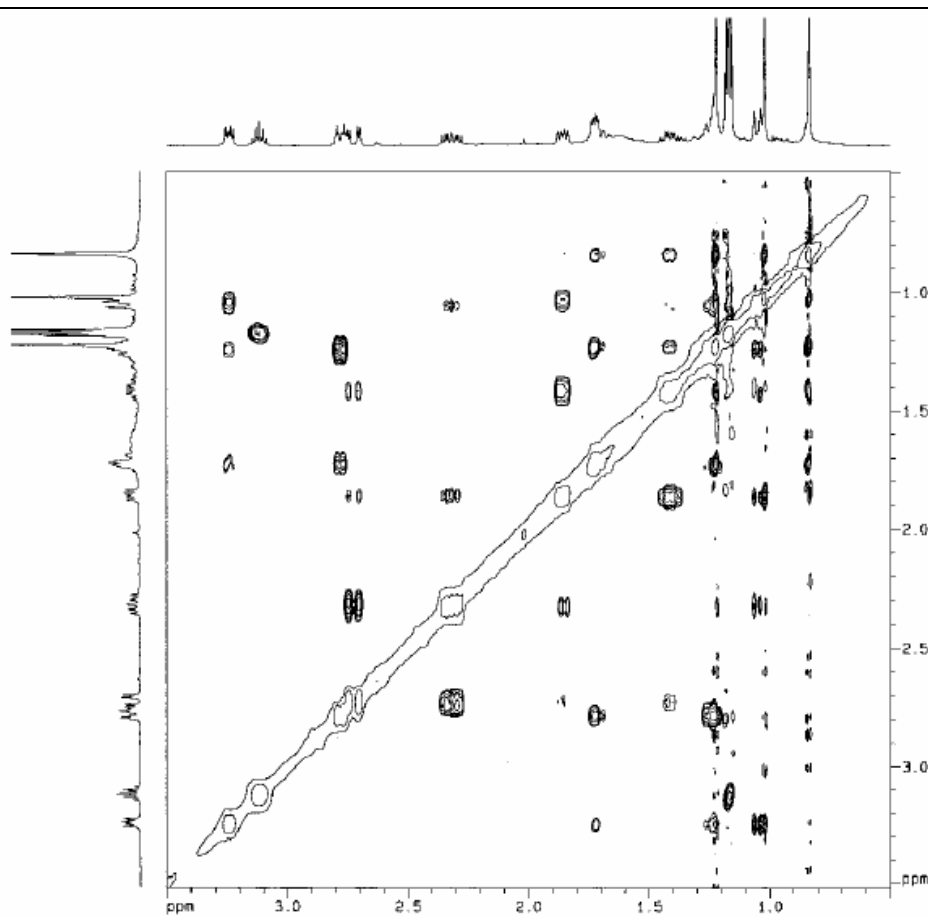

Figure S26. NOESY spectrum of 4

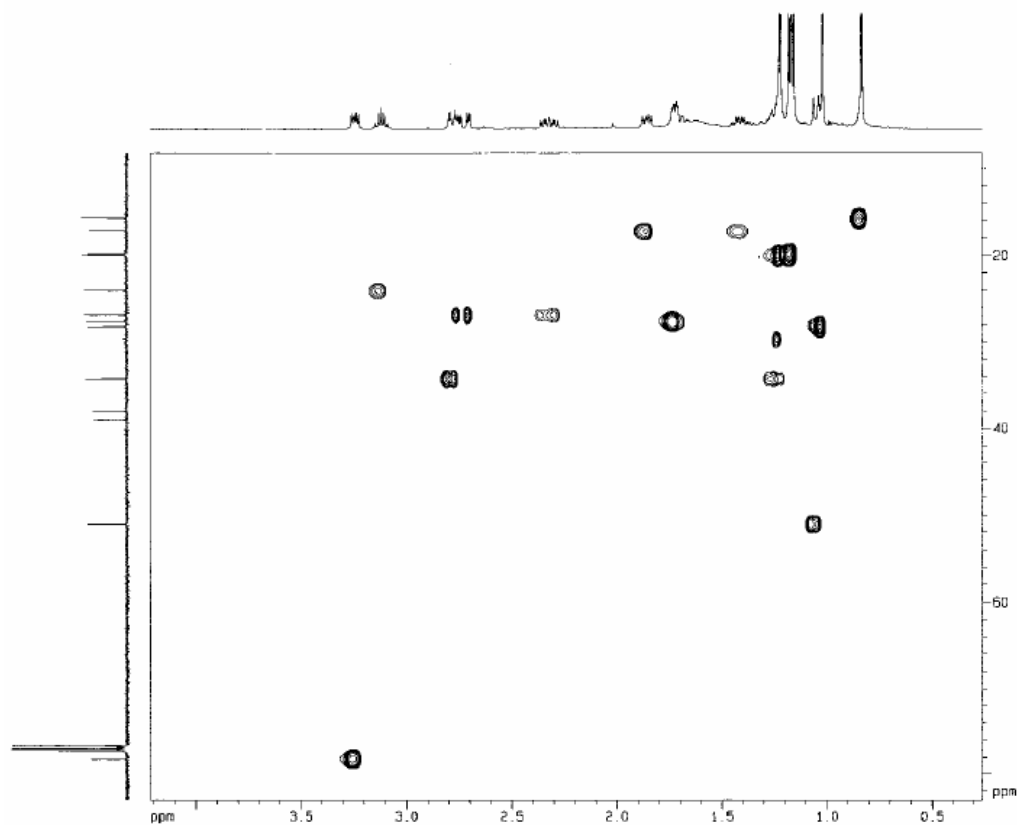

Figure S27. HSQC spectrum of 4

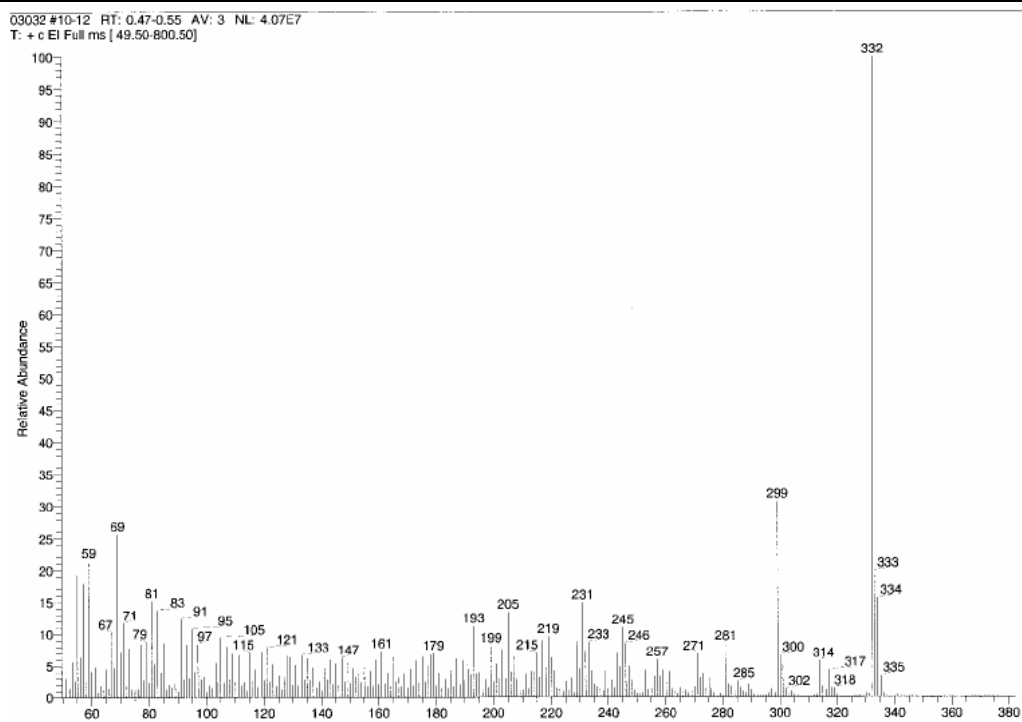

Figure S28. EI-MS spectrum

of 4

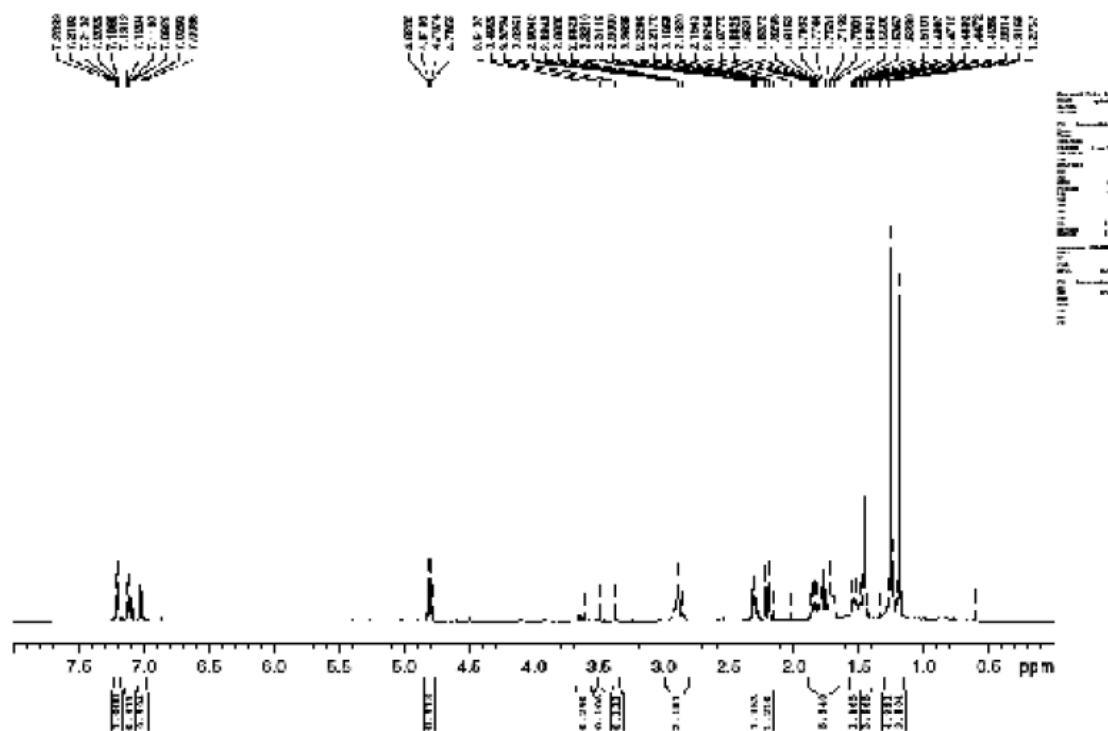Figure S29. <sup>1</sup>H NMR spectrum of 5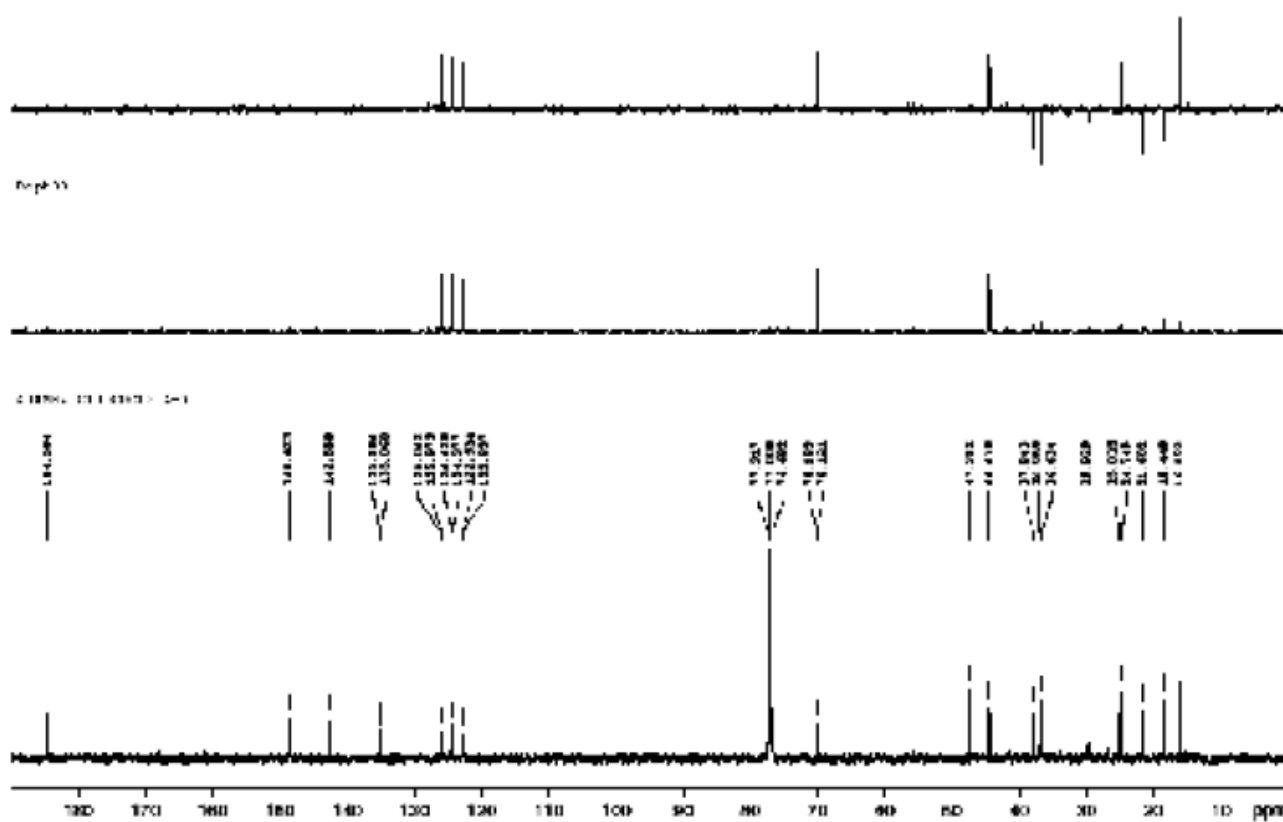Figure S30. <sup>13</sup>C NMR spectrum of 5

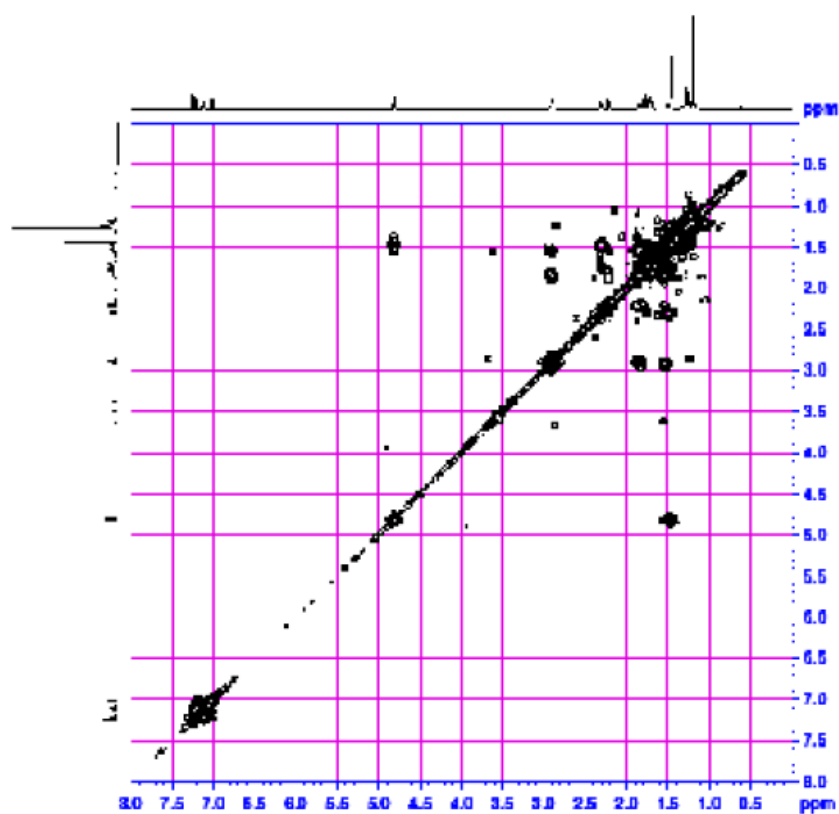

Figure S31. COSY spectrum of 5

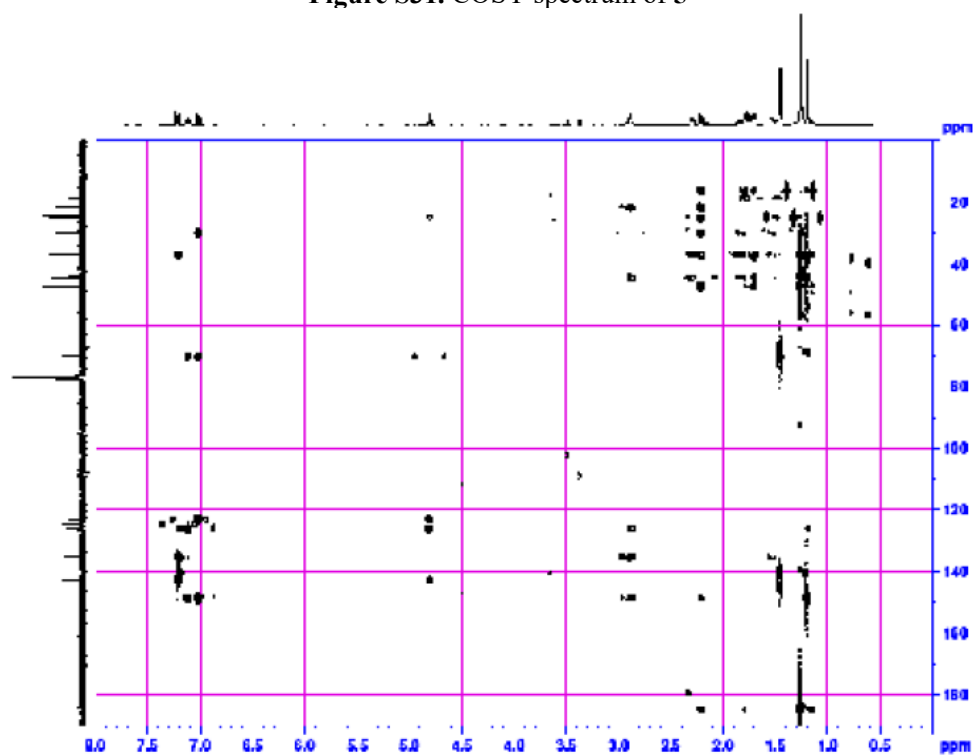

Figure S32. HMBC spectrum of 5

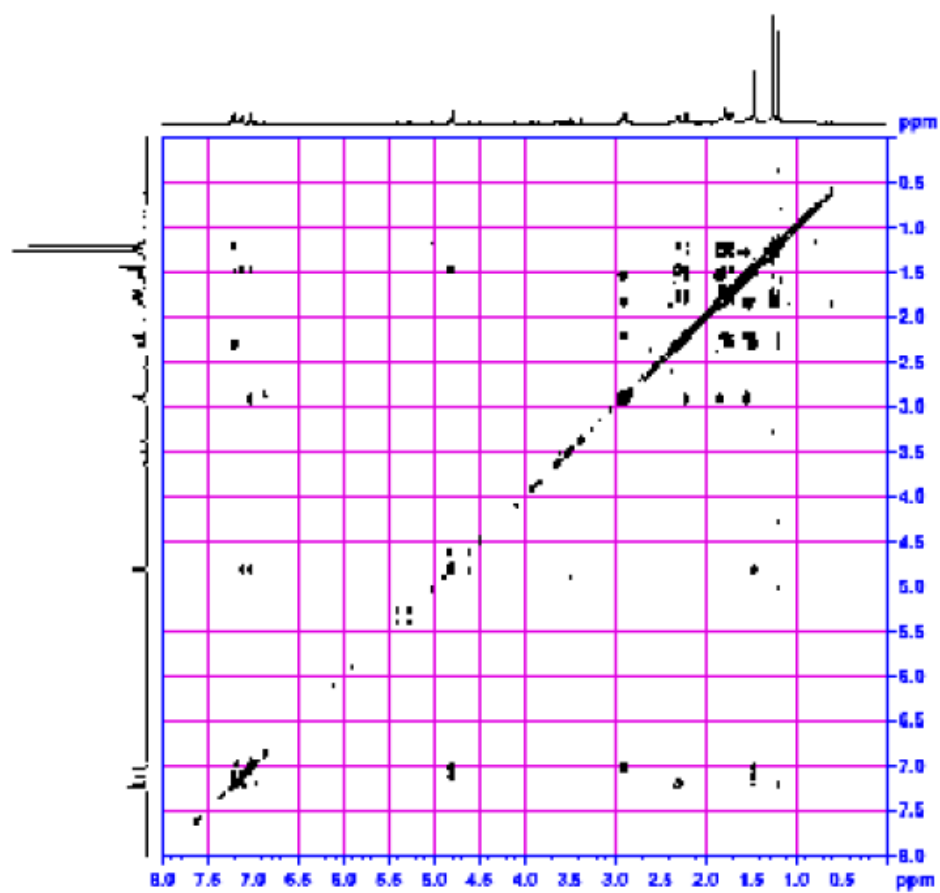

Figure S33. NOESY spectrum of 5

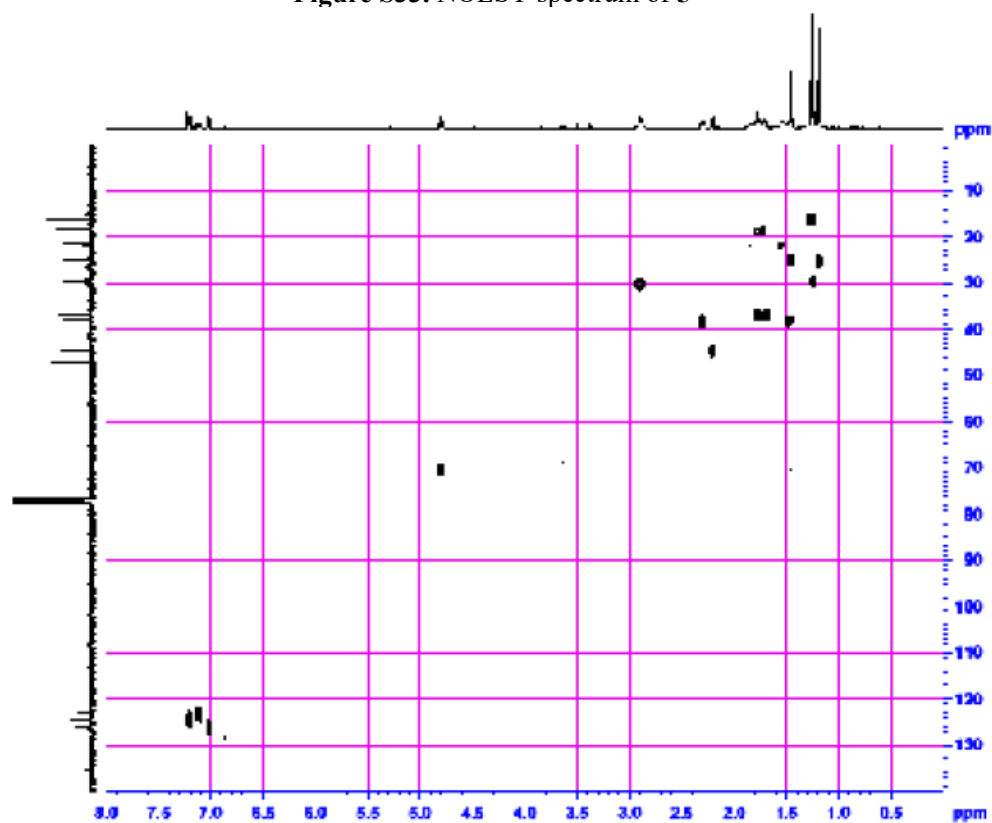

Figure S34. HSQC spectrum of 5

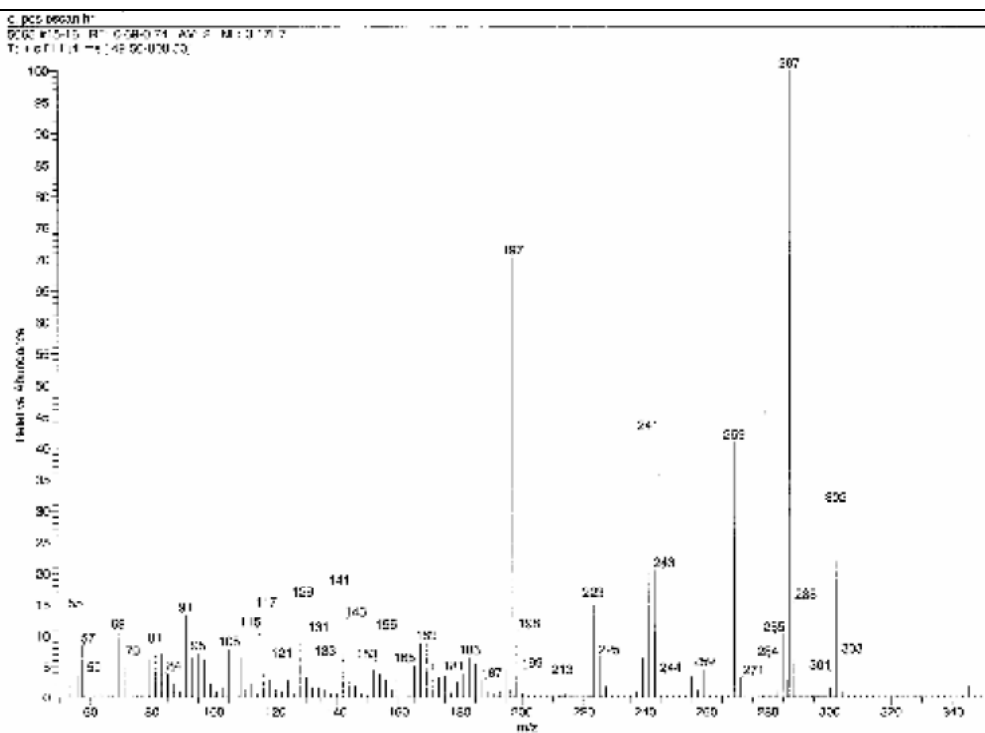



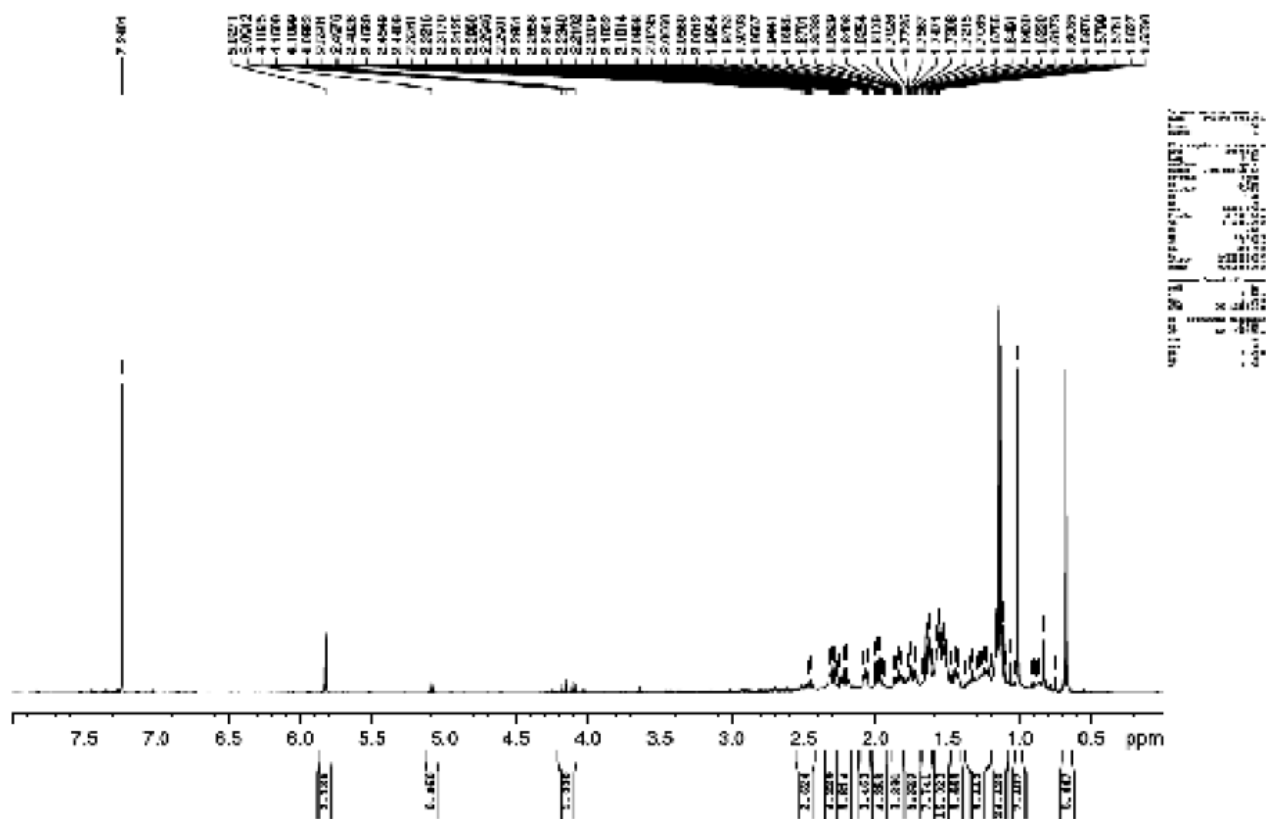

**Figure S36.**  $^1\text{H}$  NMR spectrum of **6**

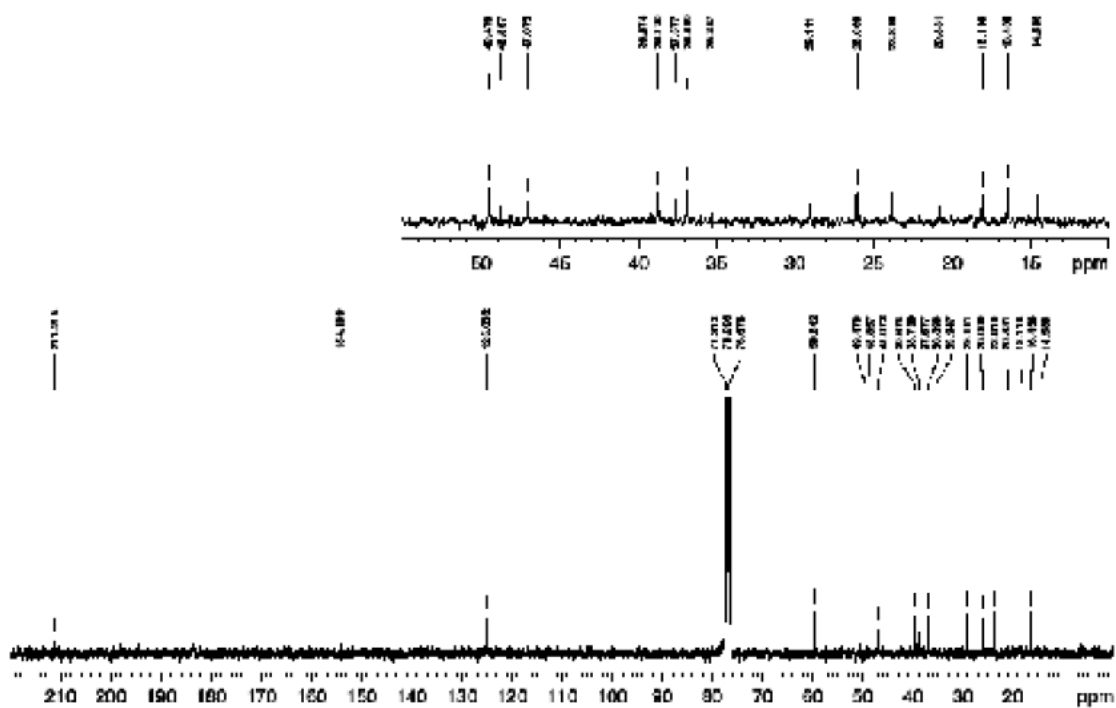

**Figure S37.**  $^{13}\text{C}$  NMR/DEPT spectra of **6**

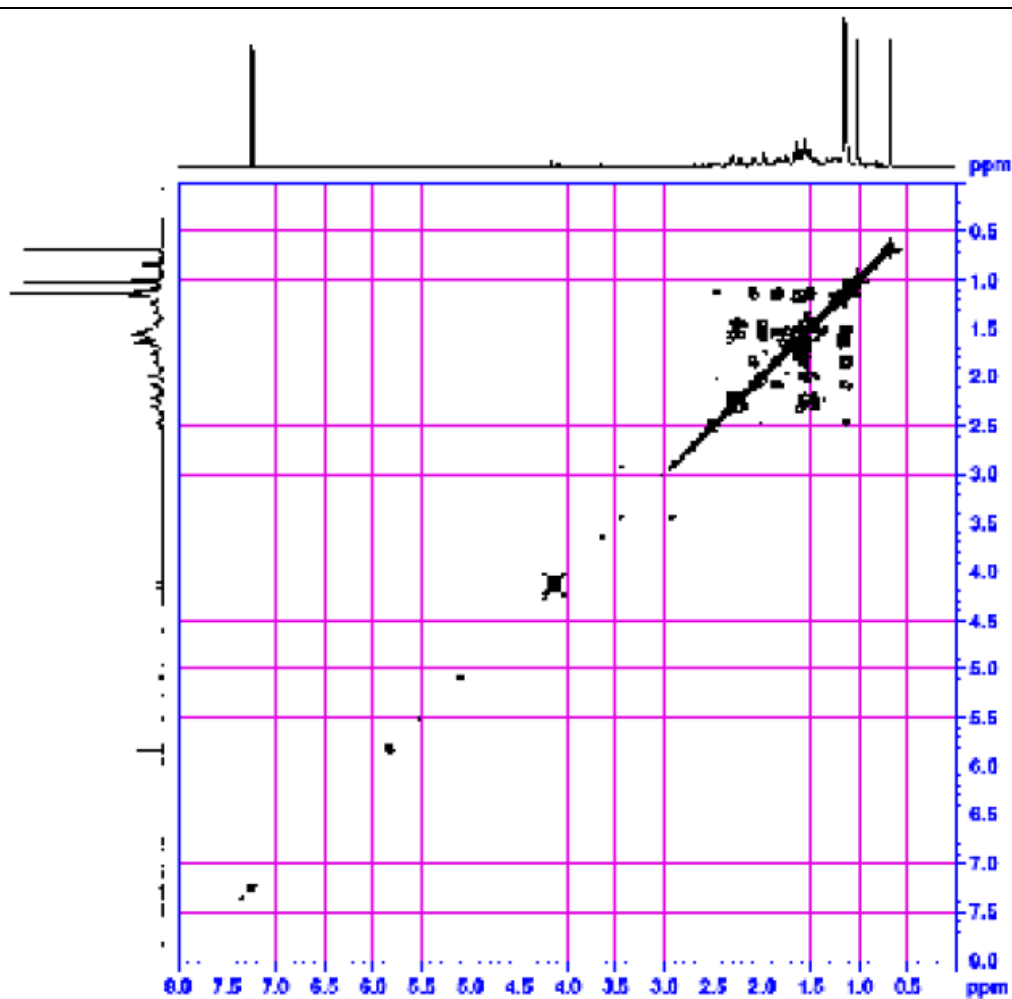

Figure S38. COSY spectrum of 6

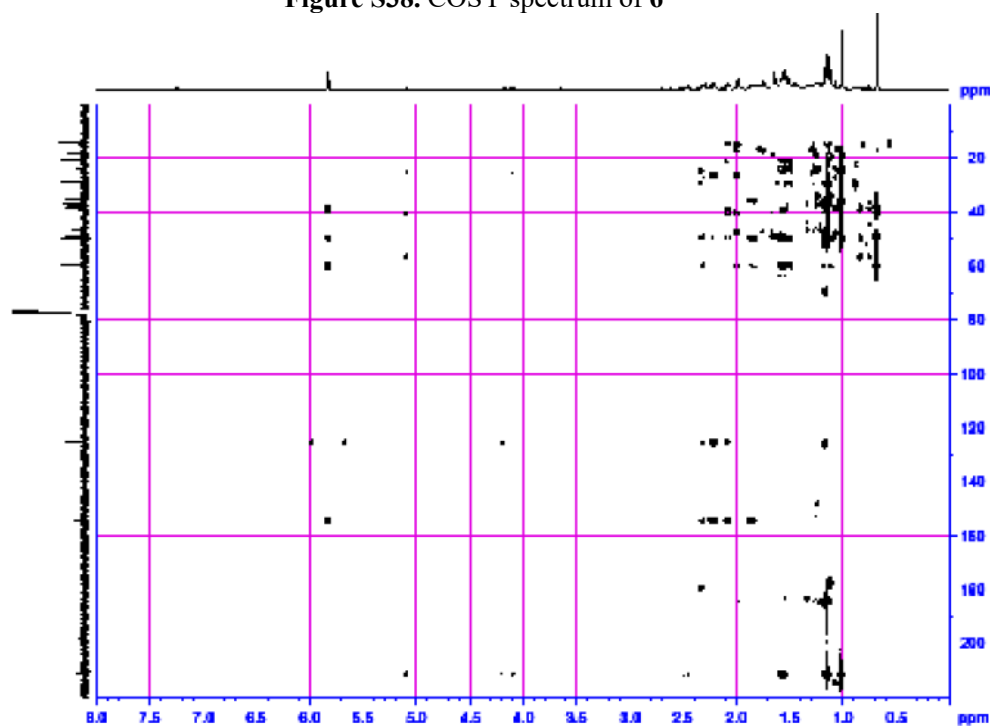

Figure S39. HMBC spectrum of 6

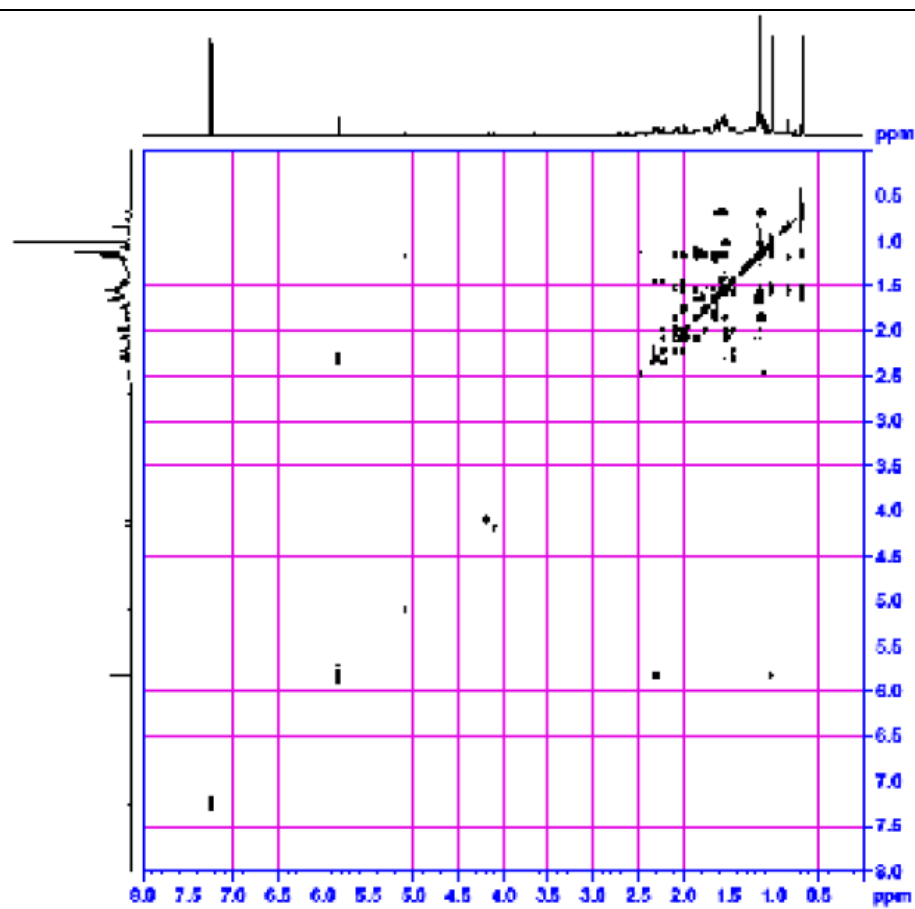

Figure S40. NOESY spectrum of 6

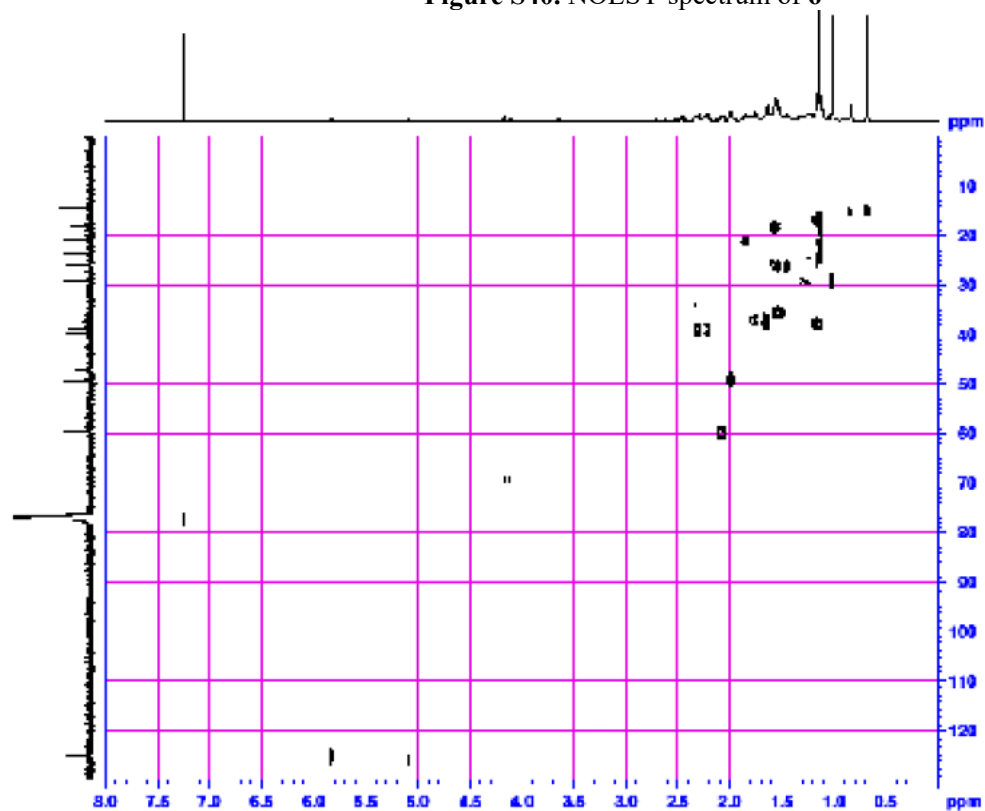

Figure S41. HSQC spectrum of 6

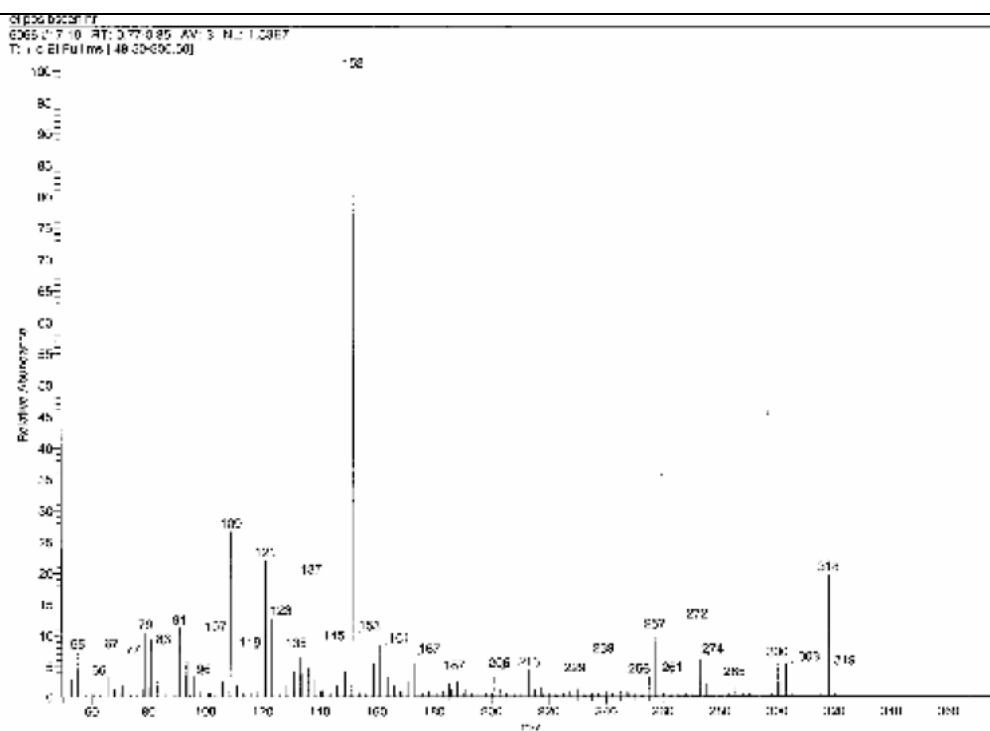Figure S42. EI-MS spectrum of **6**

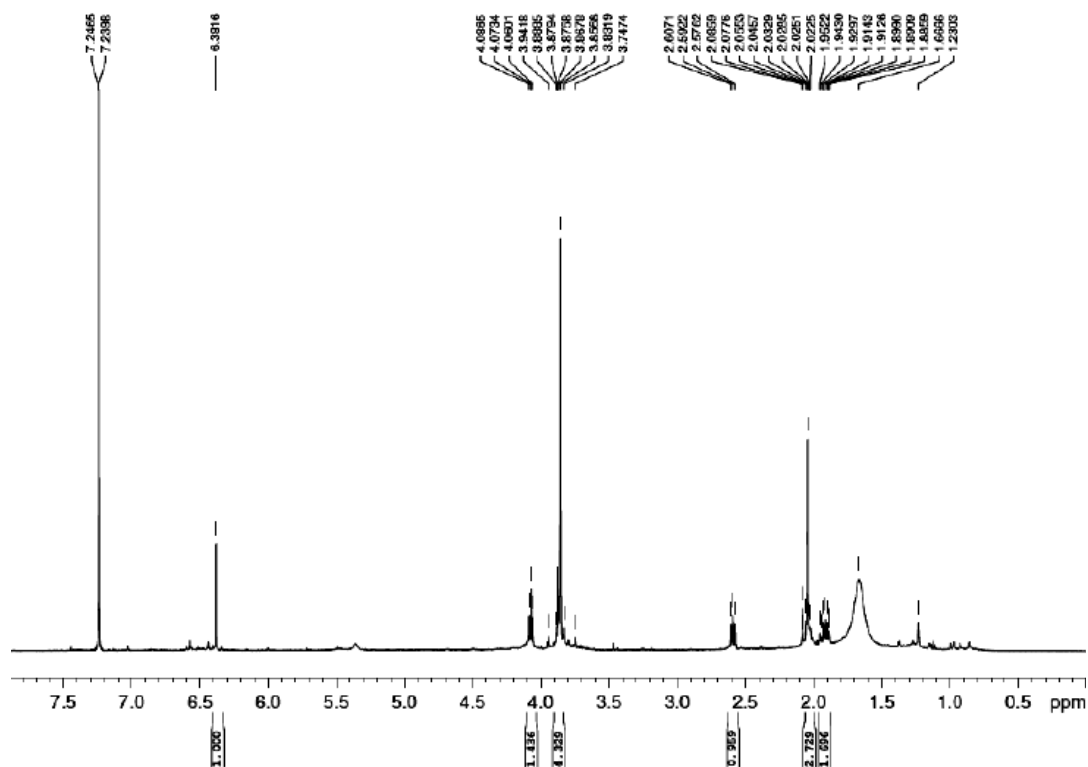Figure S43.  $^1\text{H}$  NMR spectrum of 7

Dept:135

Dept:90

500MHz CL3 CDCL3 602-3-1

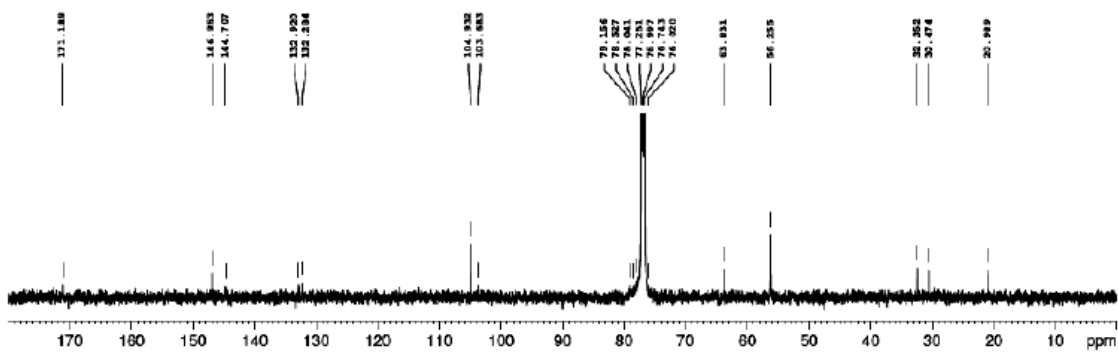Figure S44.  $^{13}\text{C}$  NMR/DEPT spectra of 7

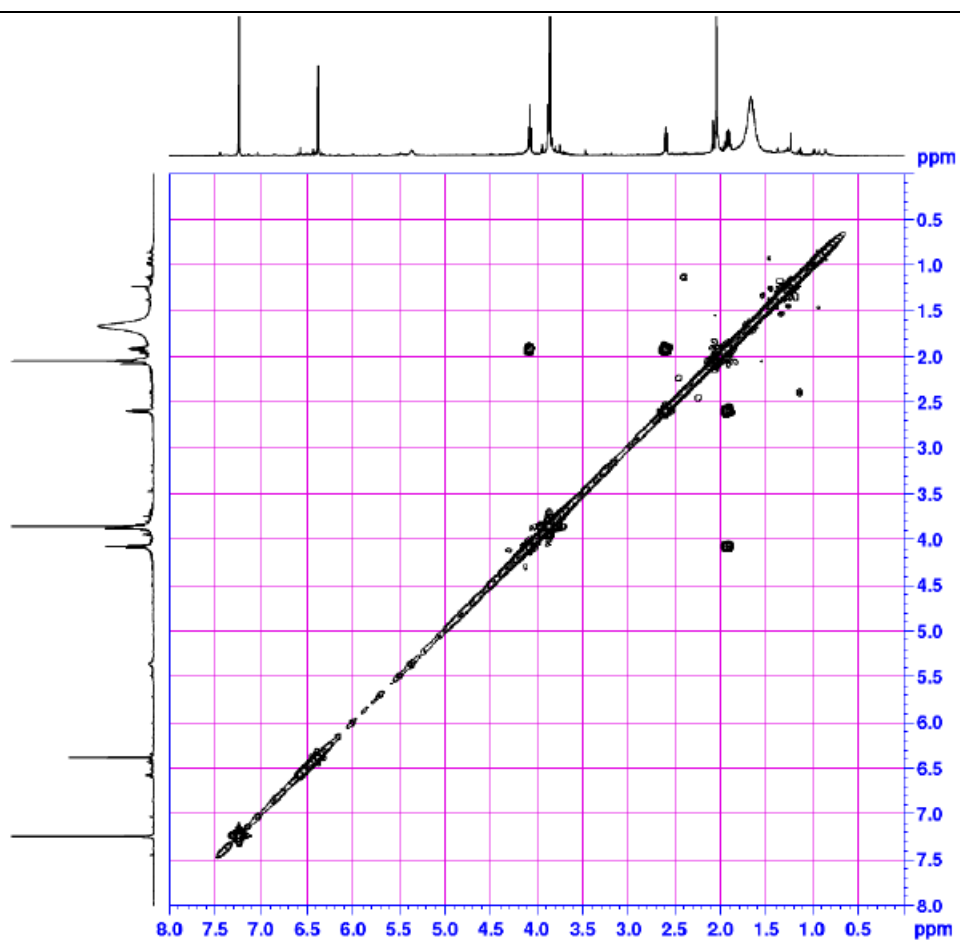

Figure S45. COSY spectrum of 7

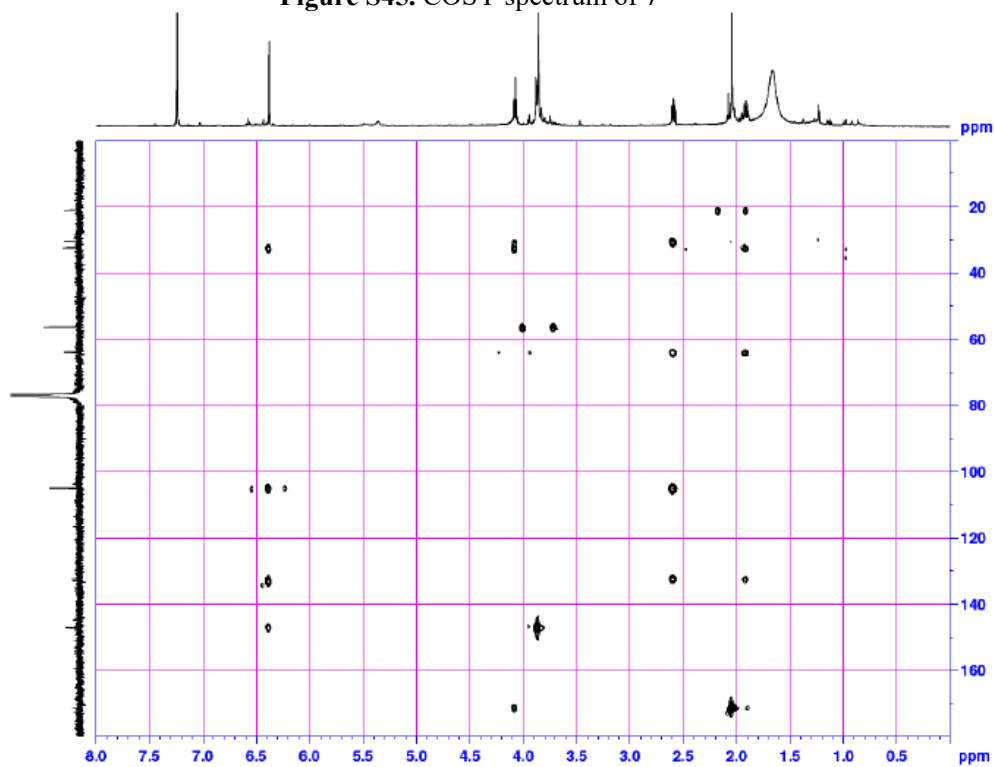

Figure S46. HMBC spectrum of 7

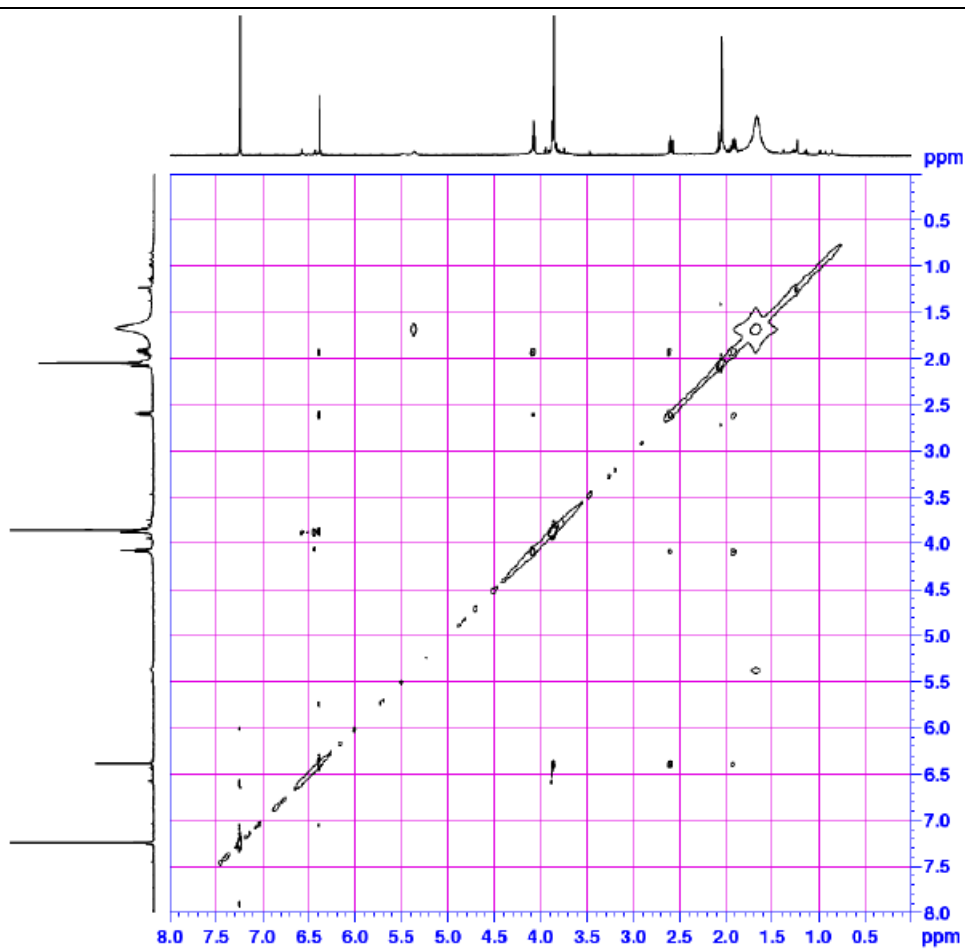

Figure S47. NOESY spectrum of 7

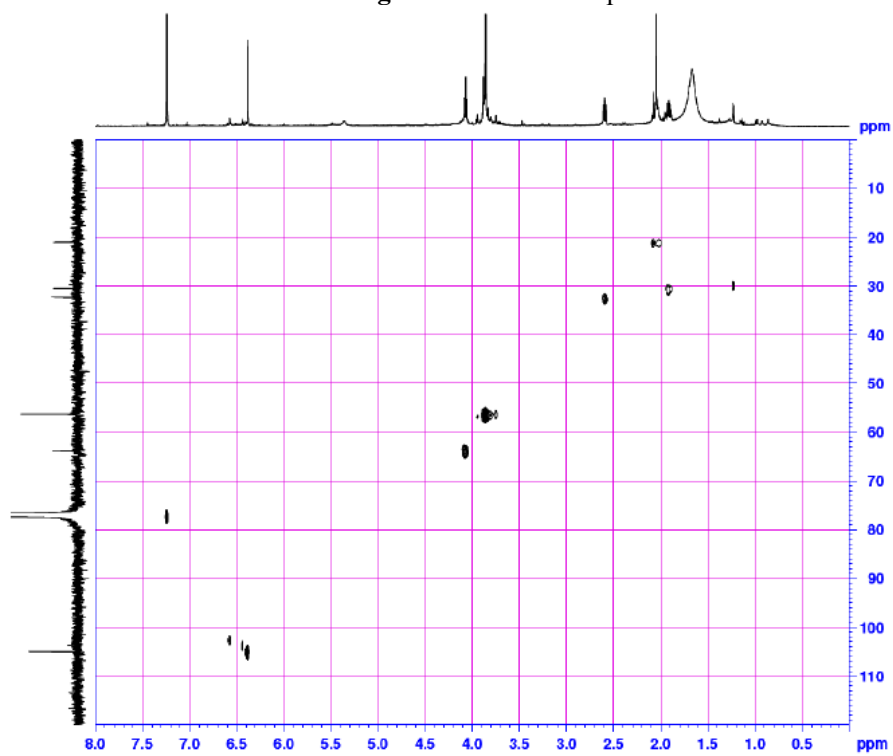

Figure S48. HSQC spectrum of 7

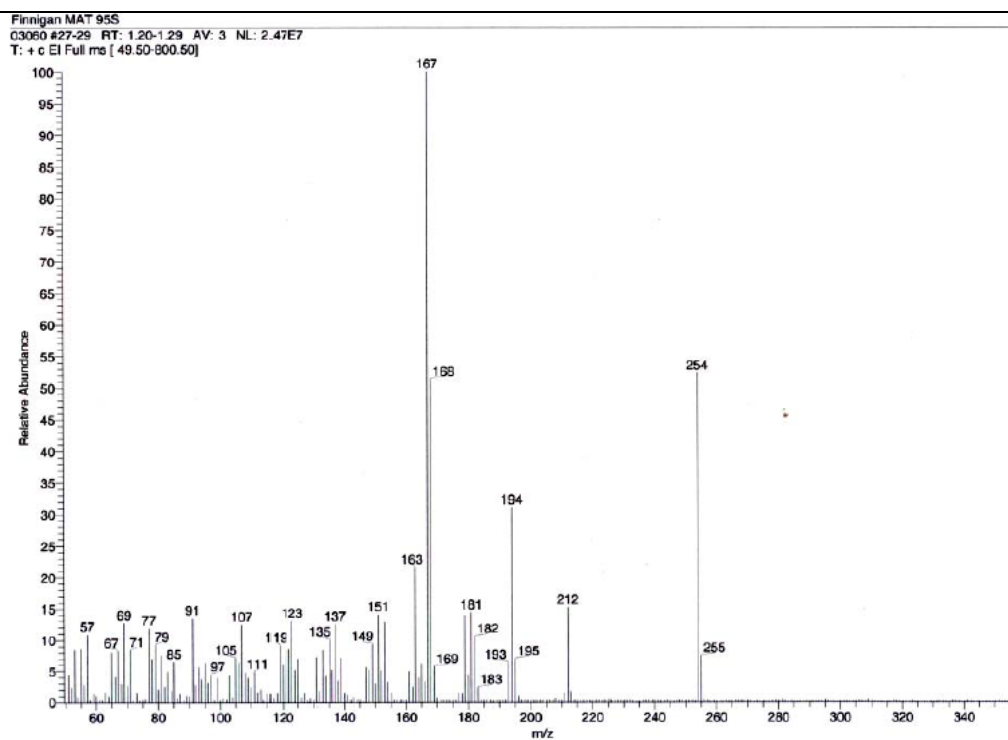

Figure S49. EI-MS spectrum of 7



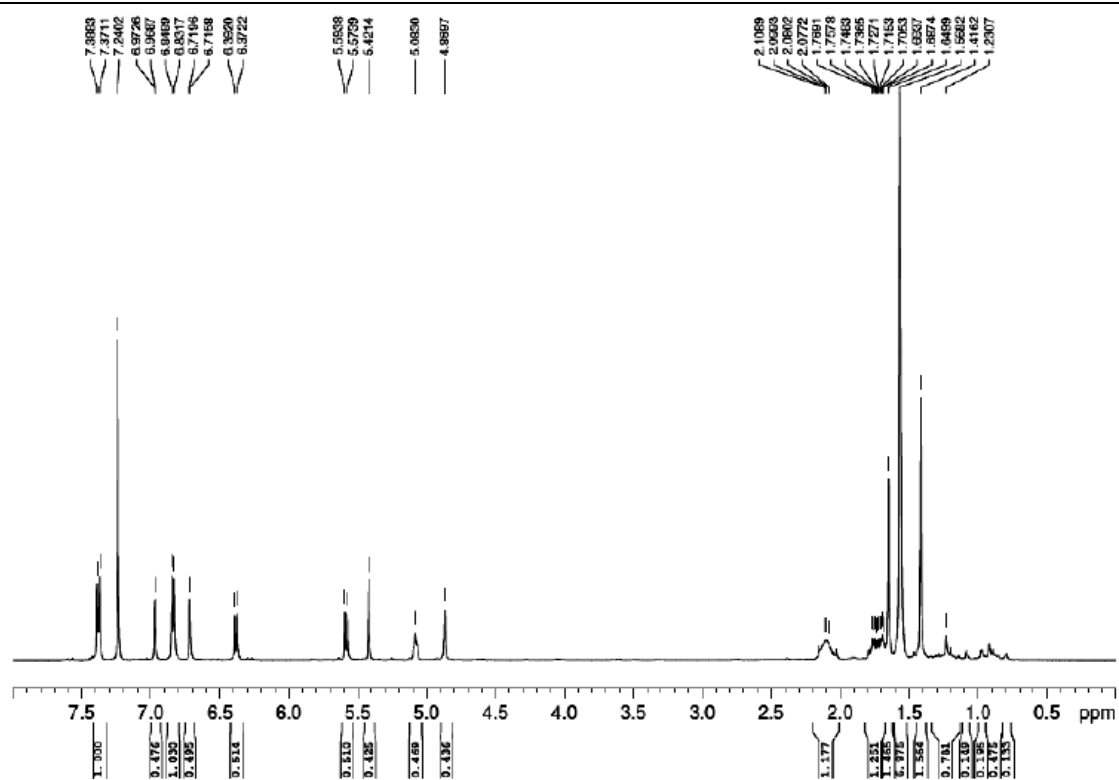Figure S50. <sup>1</sup>H NMR spectrum of 8

Dept135

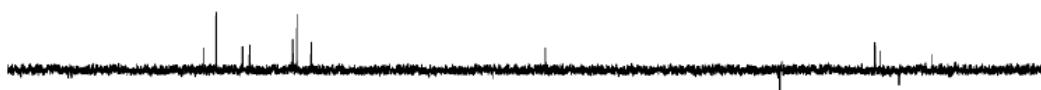

Dept90

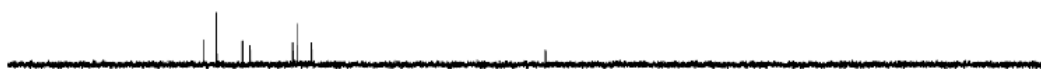

500MHz C13 CDCL3 52D-432

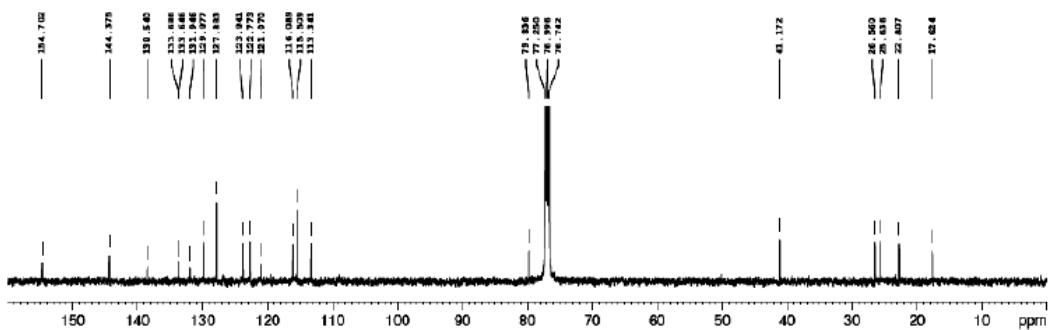Figure S51. <sup>13</sup>C NMR/DEPT spectra of 8

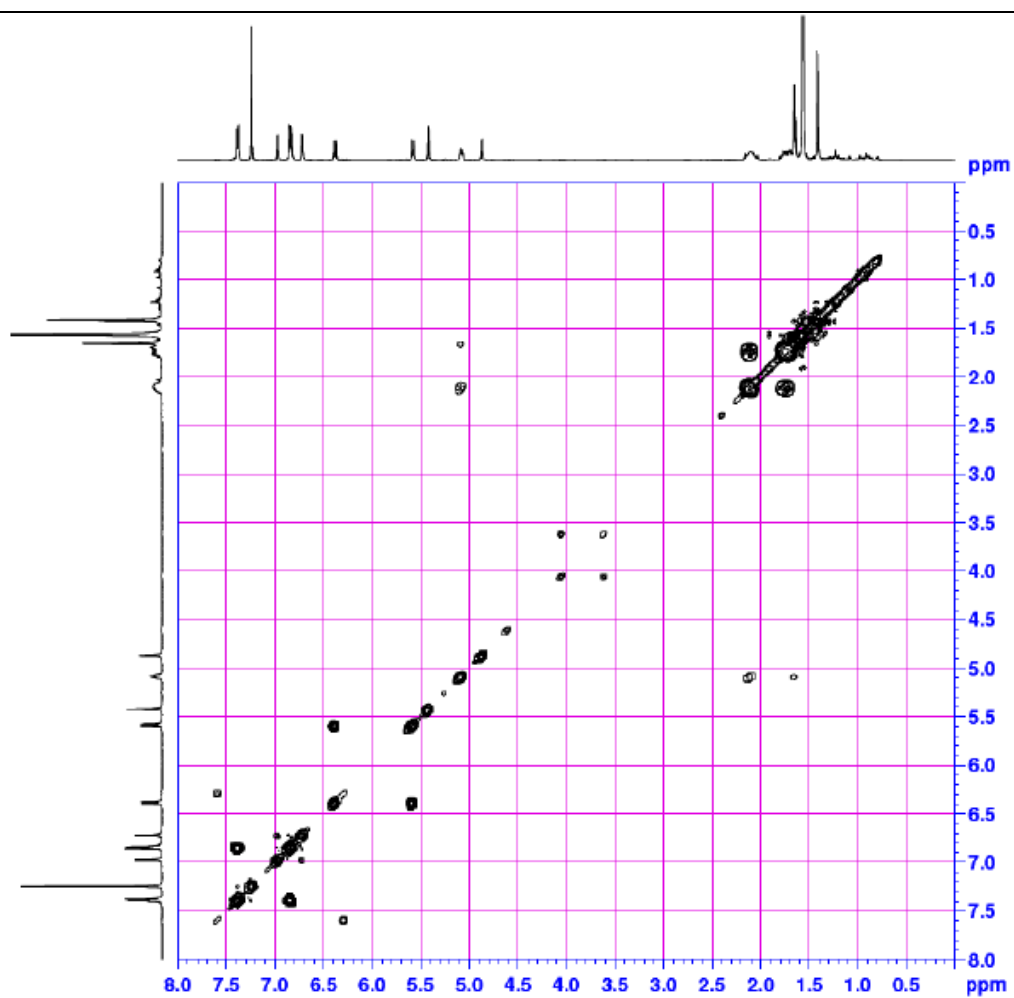

Figure S52. COSY spectrum of 8

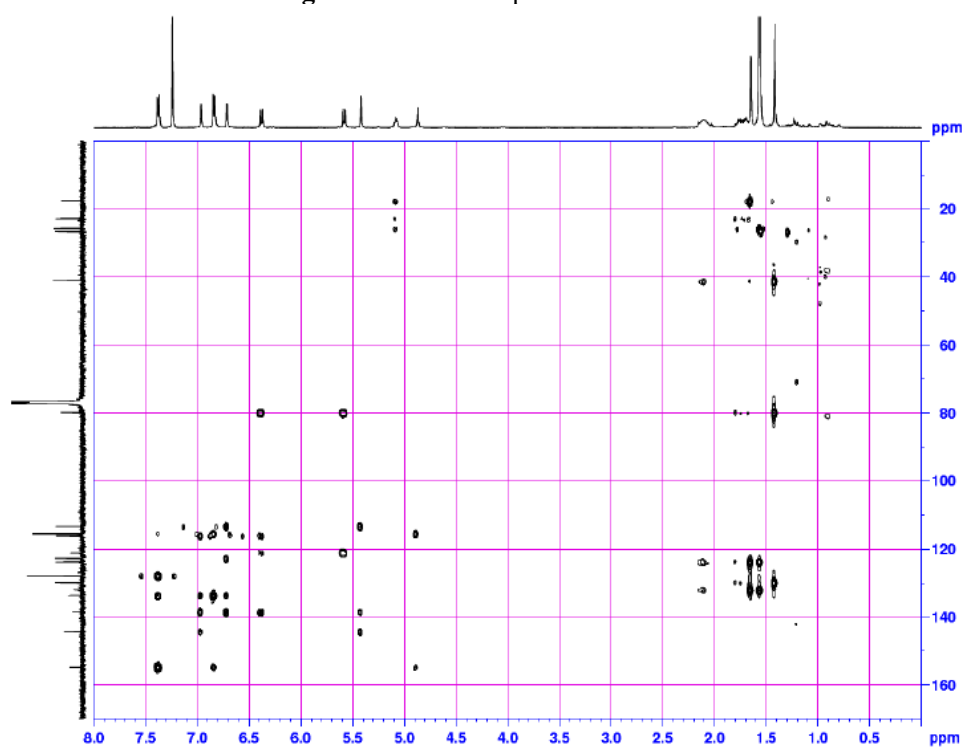

Figure S53. HMBC spectrum of 8

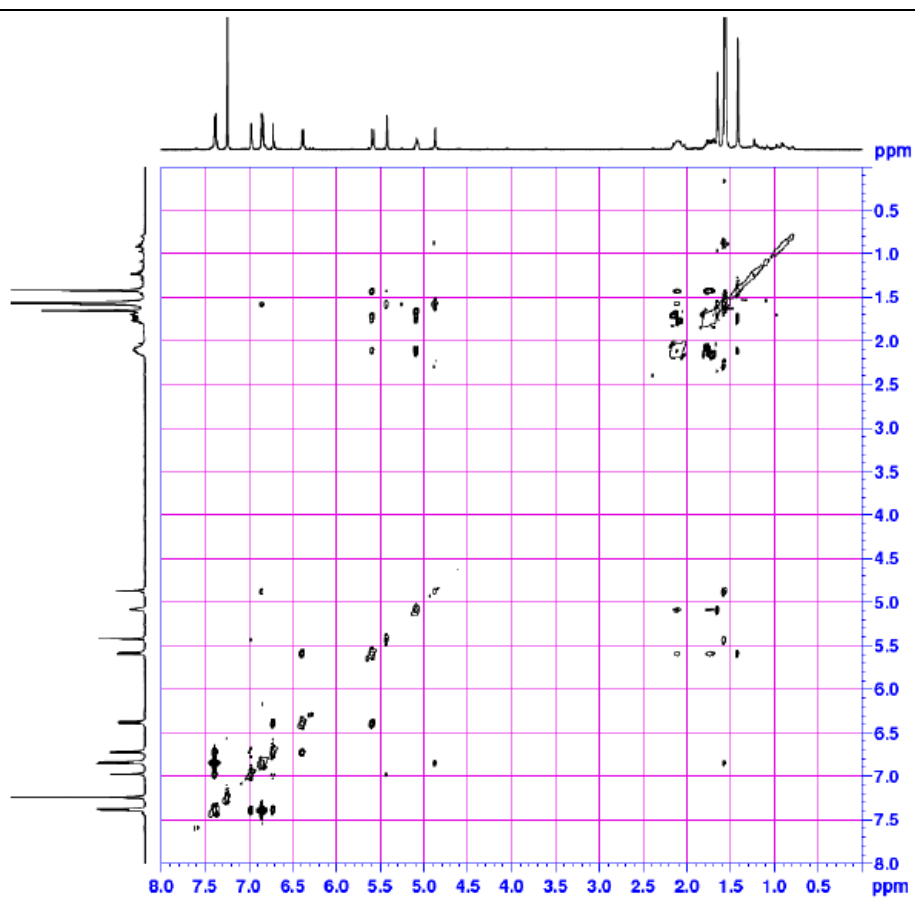

Figure S54. NOESY spectrum of 8

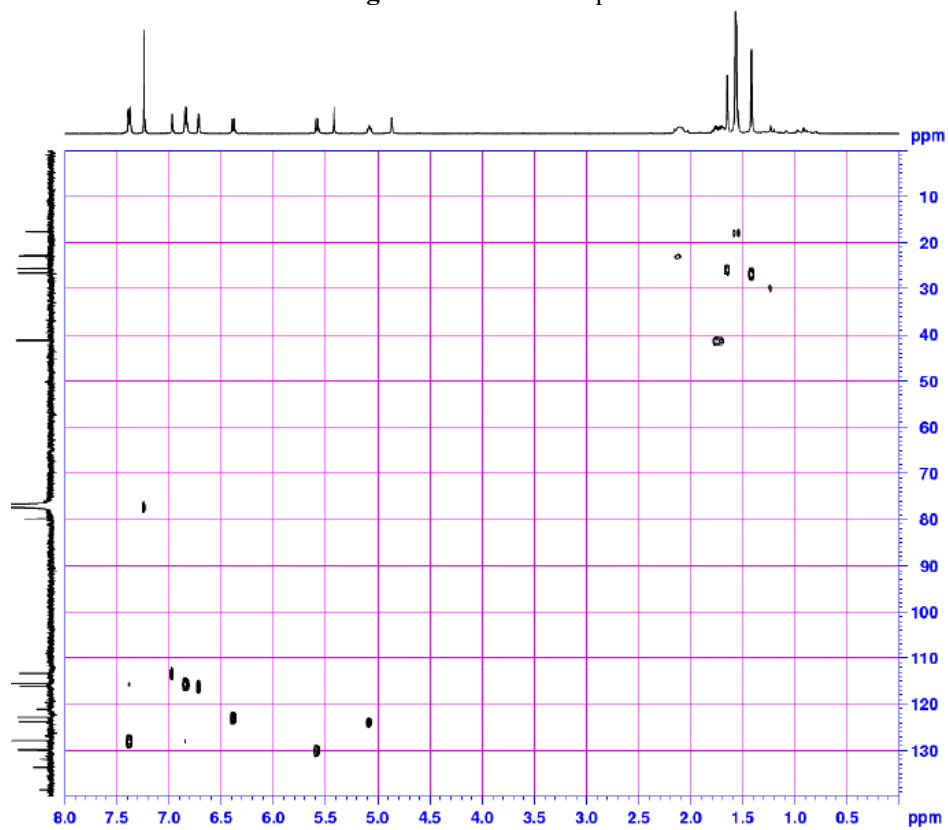

Figure S55. HSQC spectrum of 8

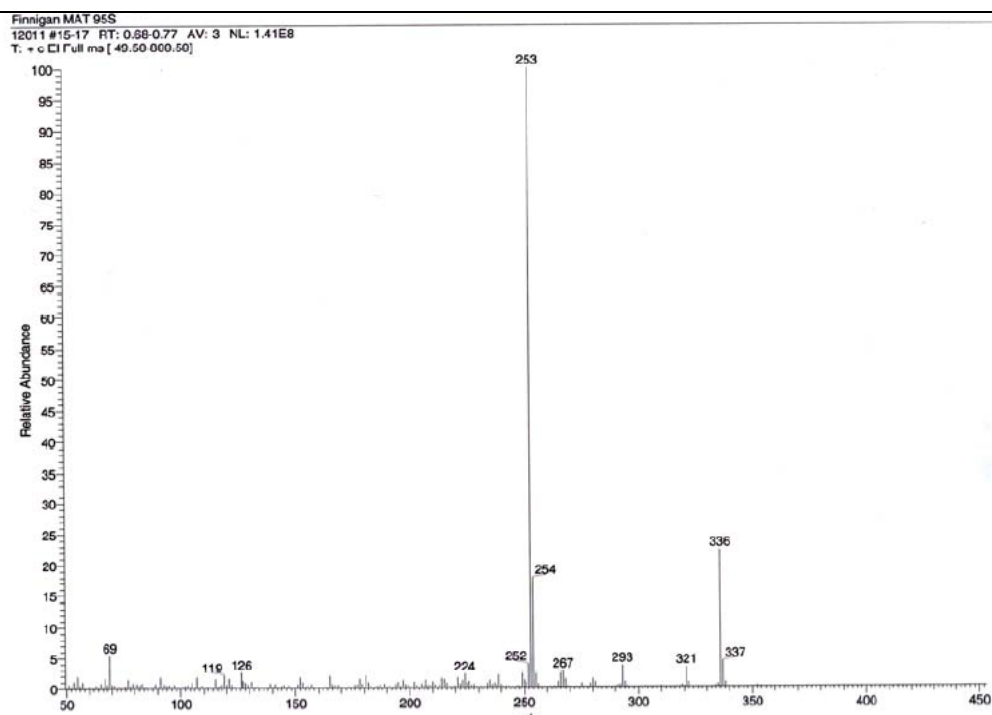

Figure S56. EI-MS spectrum of **8**

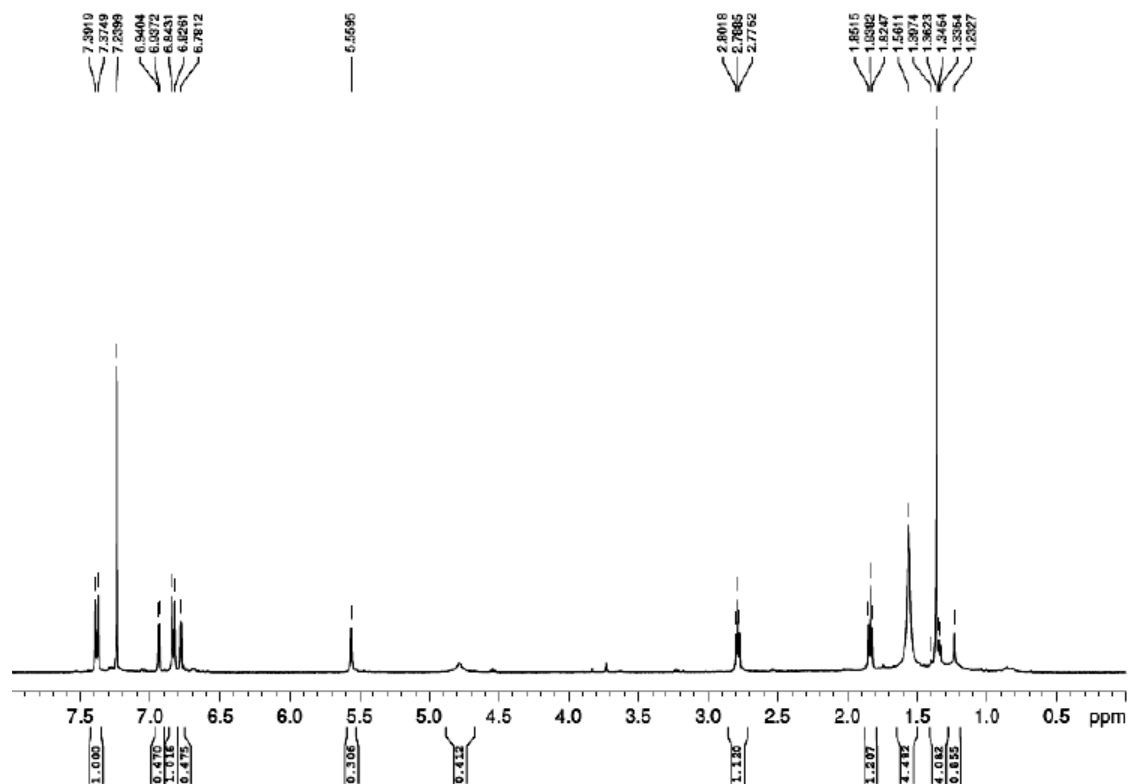Figure S57. <sup>1</sup>H NMR spectrum of 9

Depr:135

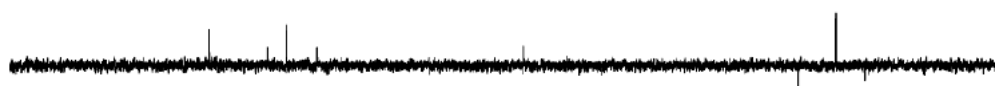

Depr:99

500MHz CDCL3 15d-6-10-1

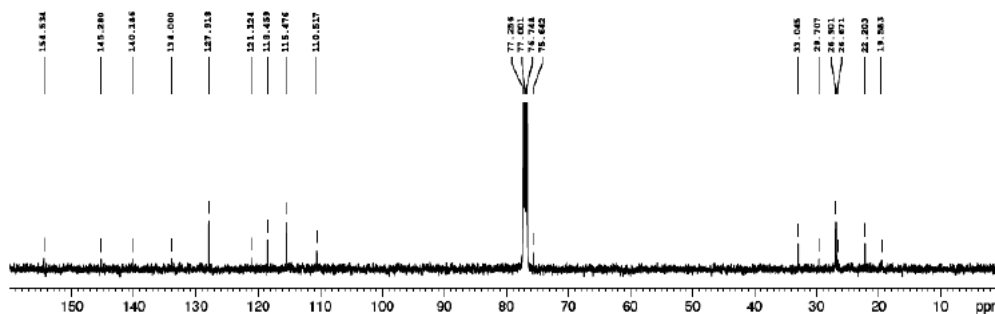Figure S58. <sup>13</sup>C NMR/DEPT spectra of 9

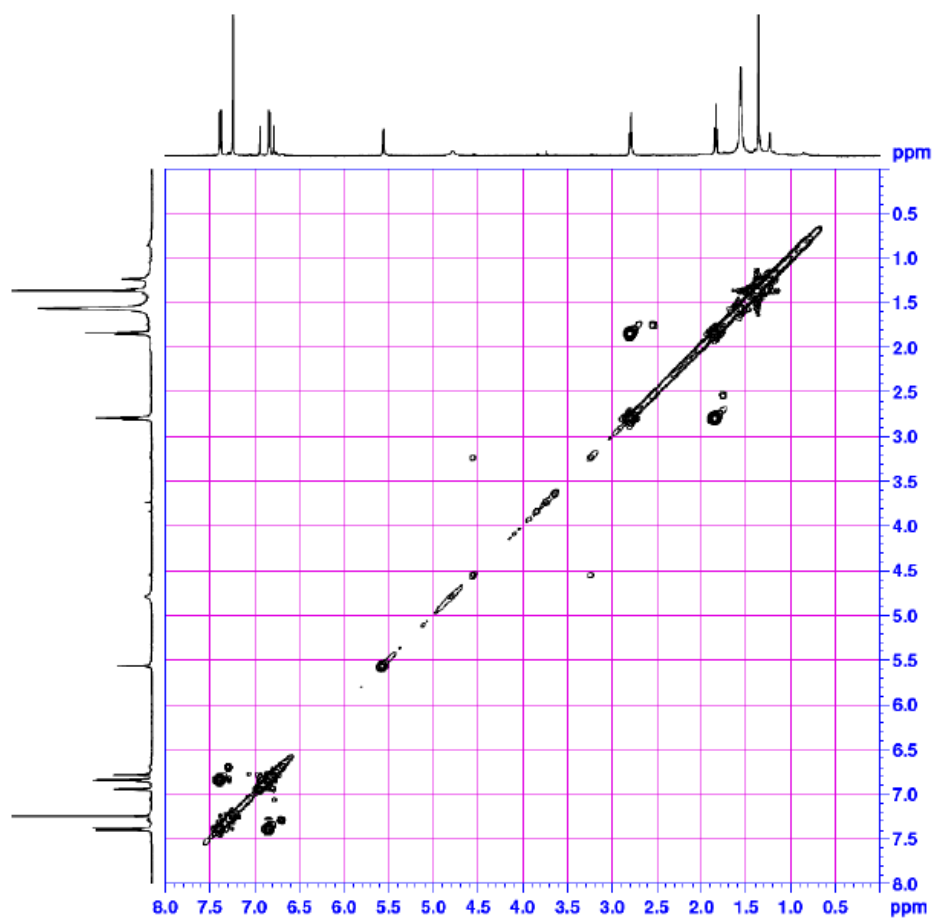

Figure S59. COSY spectrum of 9

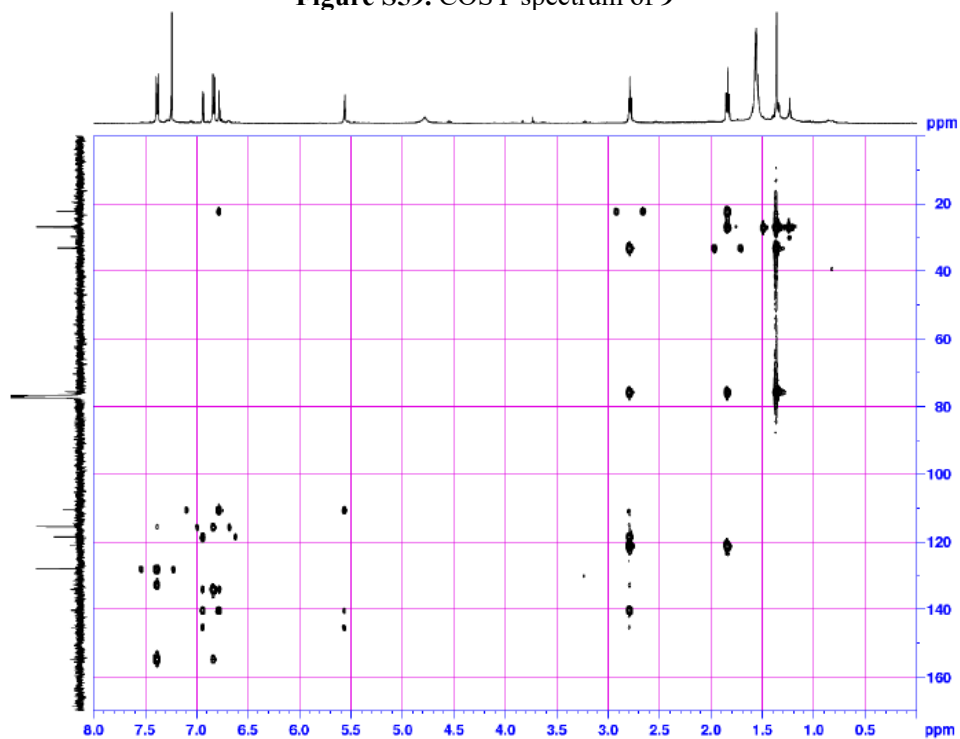

Figure S60. HMBC spectrum of 9

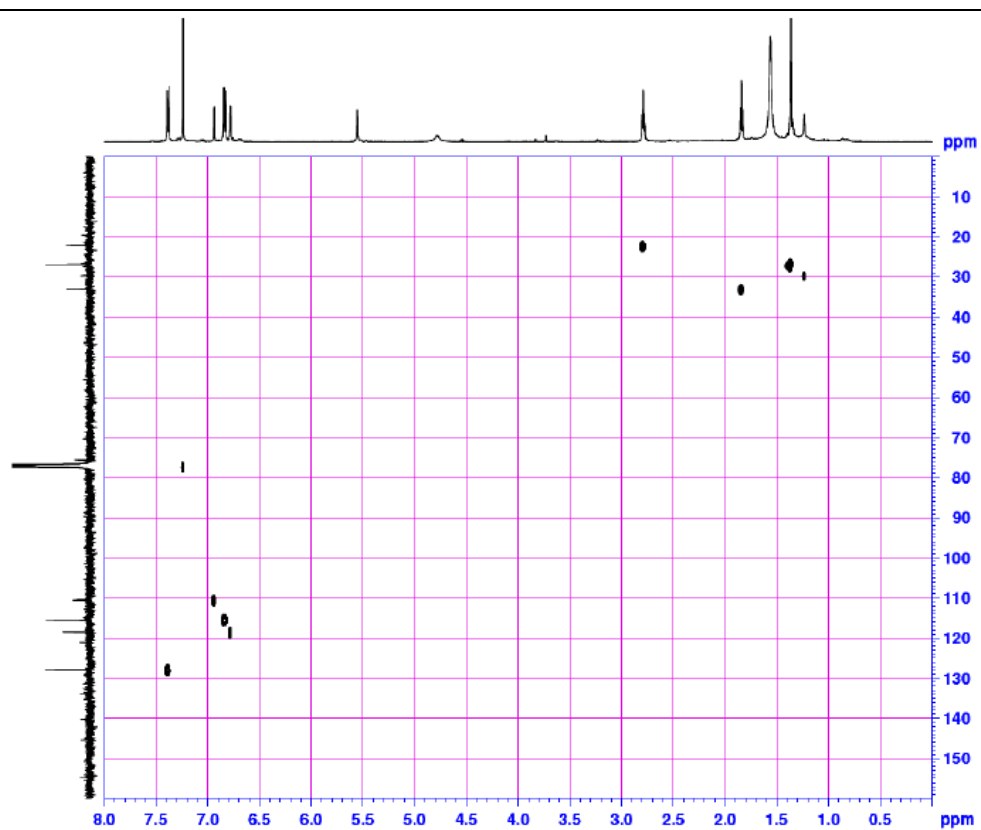

Figure S61. NOESY spectrum of 9

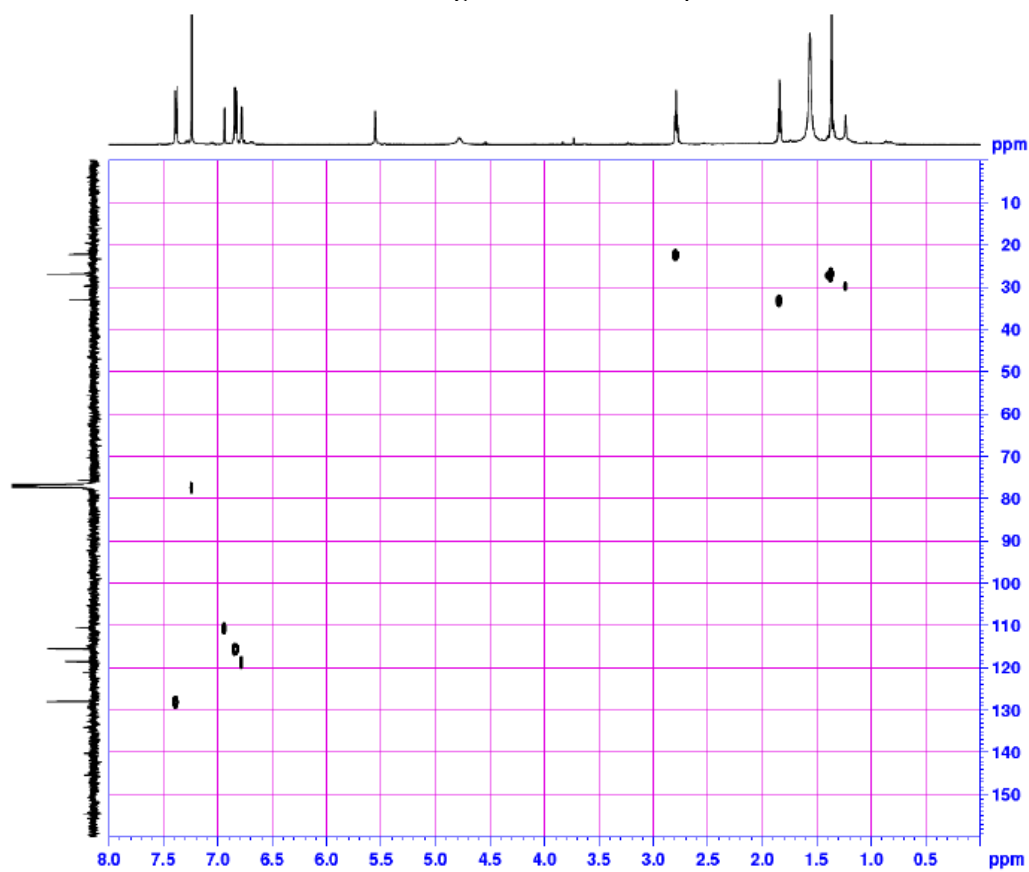

Figure S62 HSQC spectrum of 9

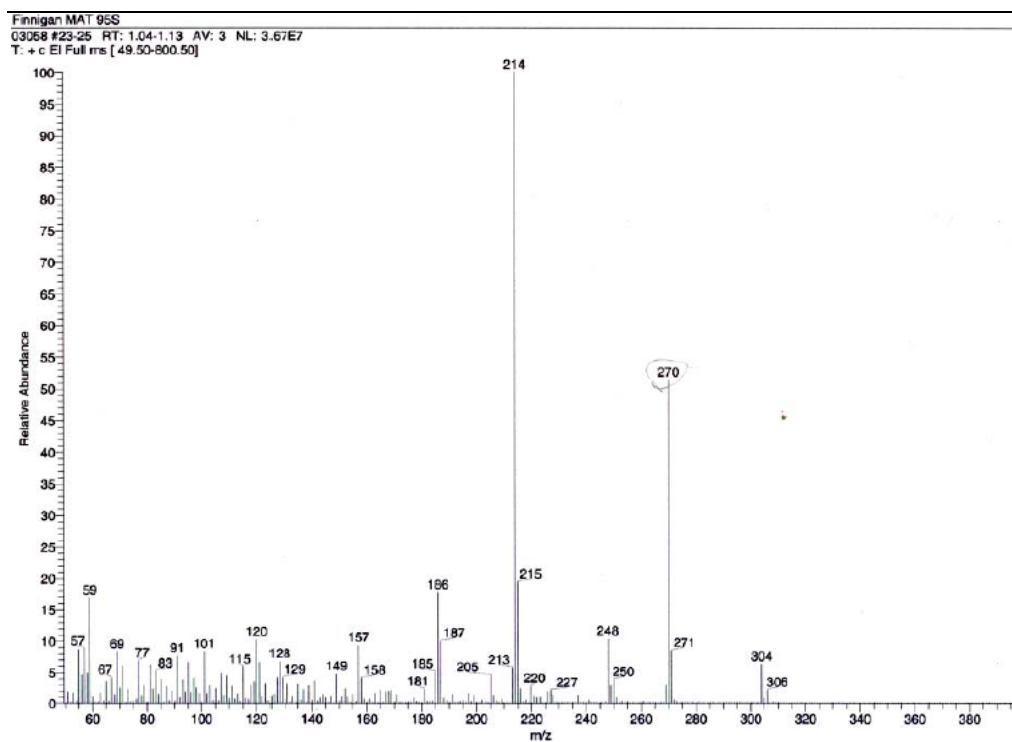Figure S63. EI-MS spectrum of **9**



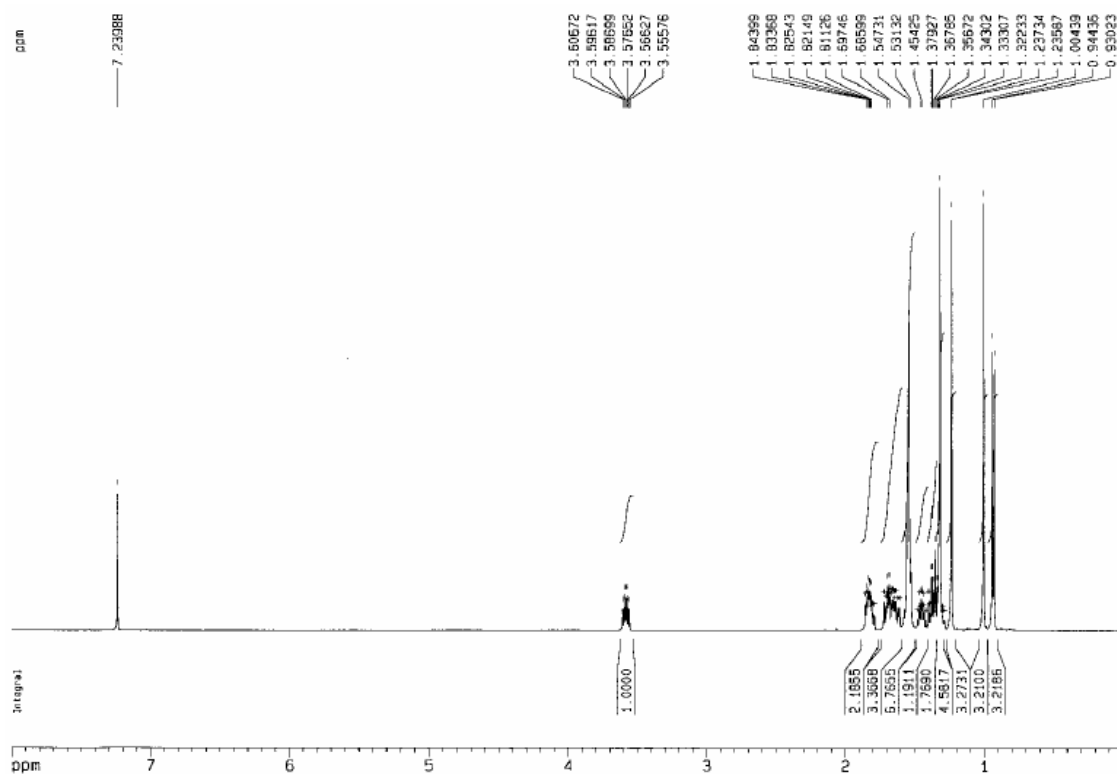Figure S64. <sup>1</sup>H NMR spectrum of 10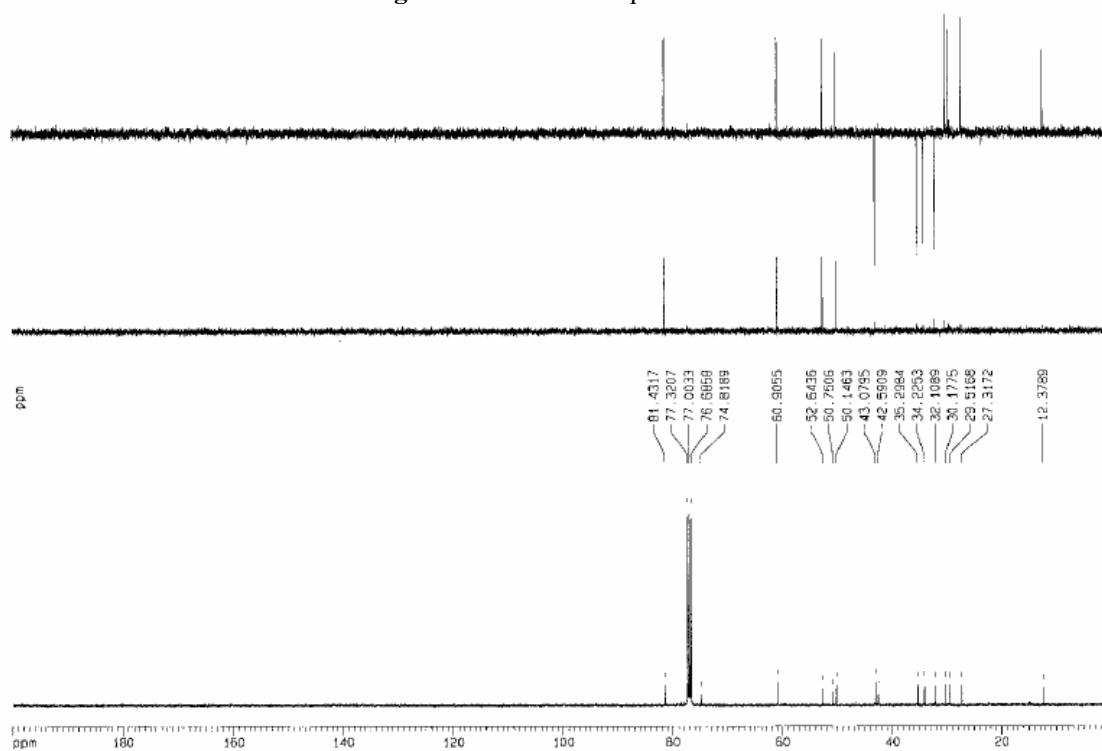Figure S65. <sup>13</sup>C NMR/DEPT spectra of 10

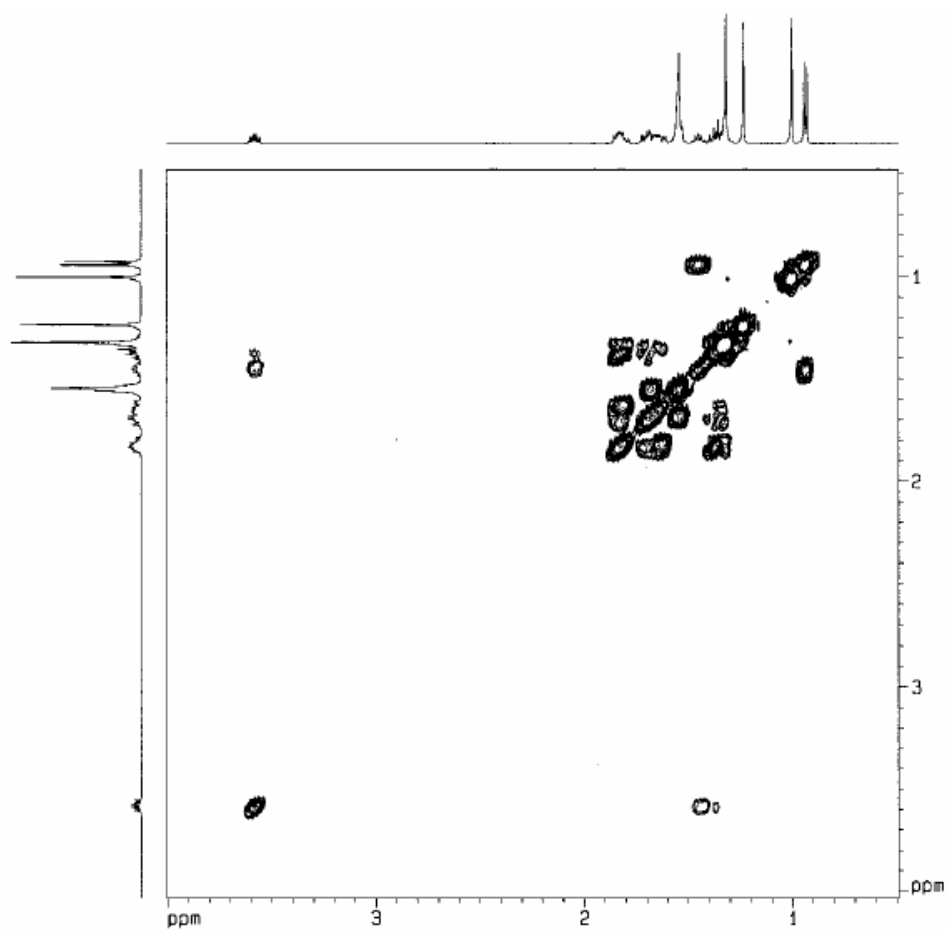

Figure S66. COSY spectrum of 10

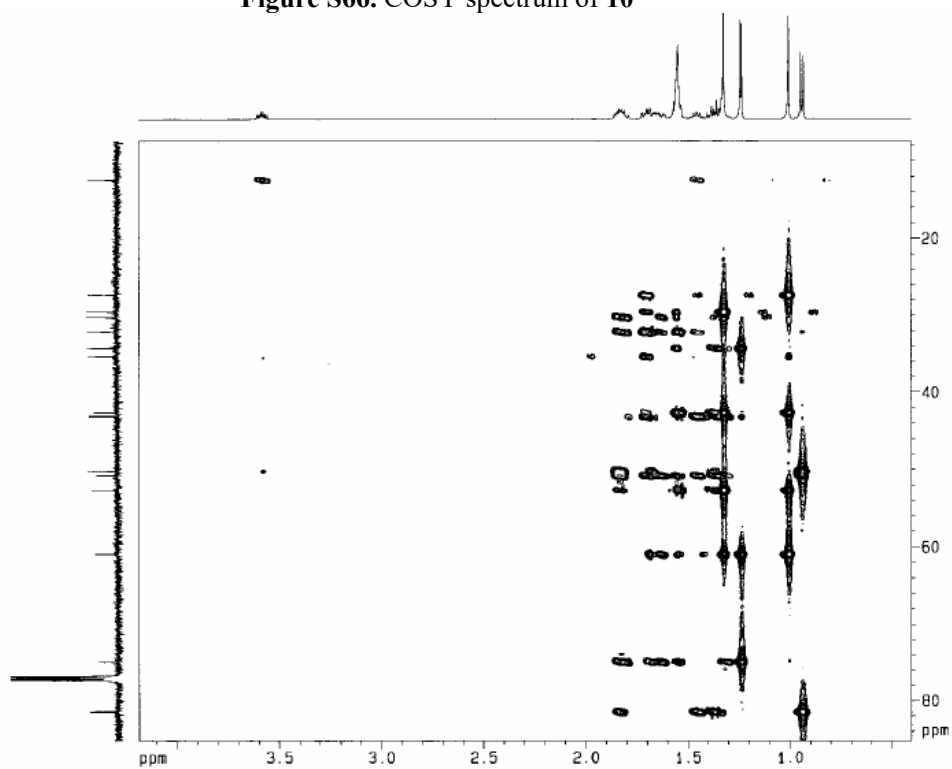

Figure S67. HMBC spectrum of 10

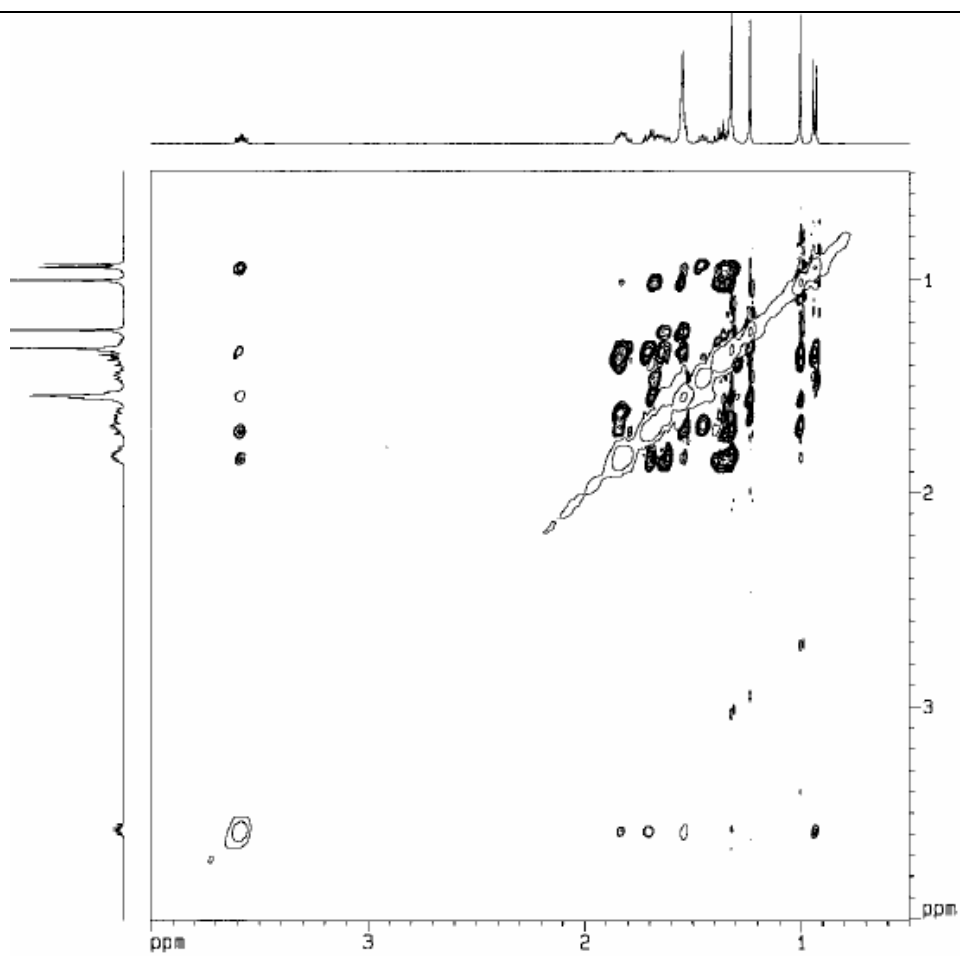

Figure S68 NOESY spectrum of 10

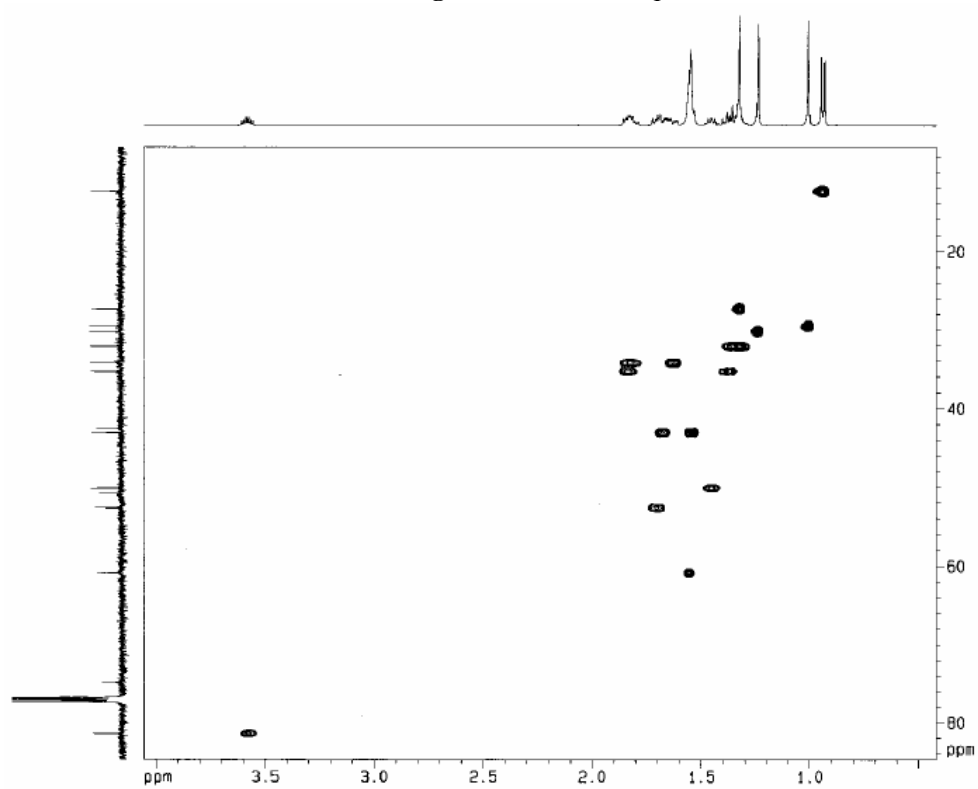

Figure S69. HSQC spectrum of 10

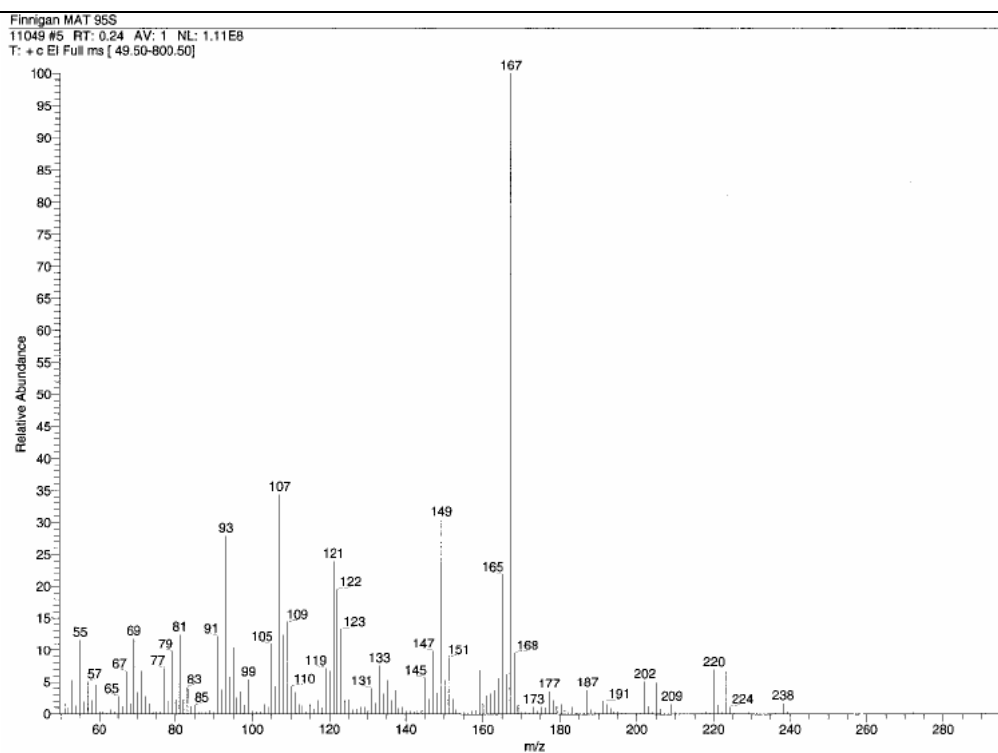**Figure S70.** EI-MS spectrum of **10**
